# Supplementary material for: Inhibition of Human Monoamine Oxidases A and B by Specialized Metabolites Present in Fresh Common Fruits and Vegetables
Source: MDPI journal article supplement (doi:10.3390/plants11030346), 2022-01-27
Supplement: s1 [file s1]

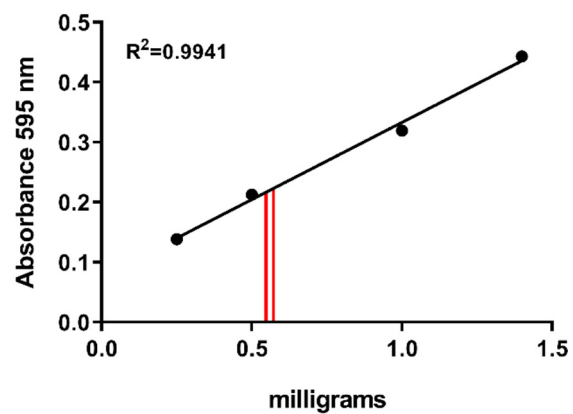

| Compound        | Protein concentration<br>(mg/ml) | Optical Density<br>(Entered) |
|-----------------|----------------------------------|------------------------------|
|                 | X                                | Y                            |
| Kiwifruit juice | 0.548 ± 0.099                    | 0.217                        |
| Neutral         | 0.573 ± 0.215                    | 0.223                        |

**Table S1 and Figure S1. Bradford Assay**

Absorbance was measured in kiwifruit and neutral solution by Bradford Assay. Values were evaluated by unpaired t-test and expressed as mean ± SD (n=4 per group).
