# Supplementary material for: Inhibition of Human Monoamine Oxidases A and B by Specialized Metabolites Present in Fresh Common Fruits and Vegetables
Source: MDPI journal article supplement (doi:10.3390/plants11030346), 2022-01-27
Supplement: s1 [file s1]

# Supplementary File S1

- NMR spectrum of kiwifruit
- Chromatographic profiles obtained in negative ionization mode by UPLC-ESI-MS, with a method optimized for small molecule (**A**) and a standard method (**B**). The numbers in black represent the putatively annotated metabolites, described in Table 3. The numbers in red are the m/z values of abundant and unidentified metabolites.
- Table of relative contents of quinic acid

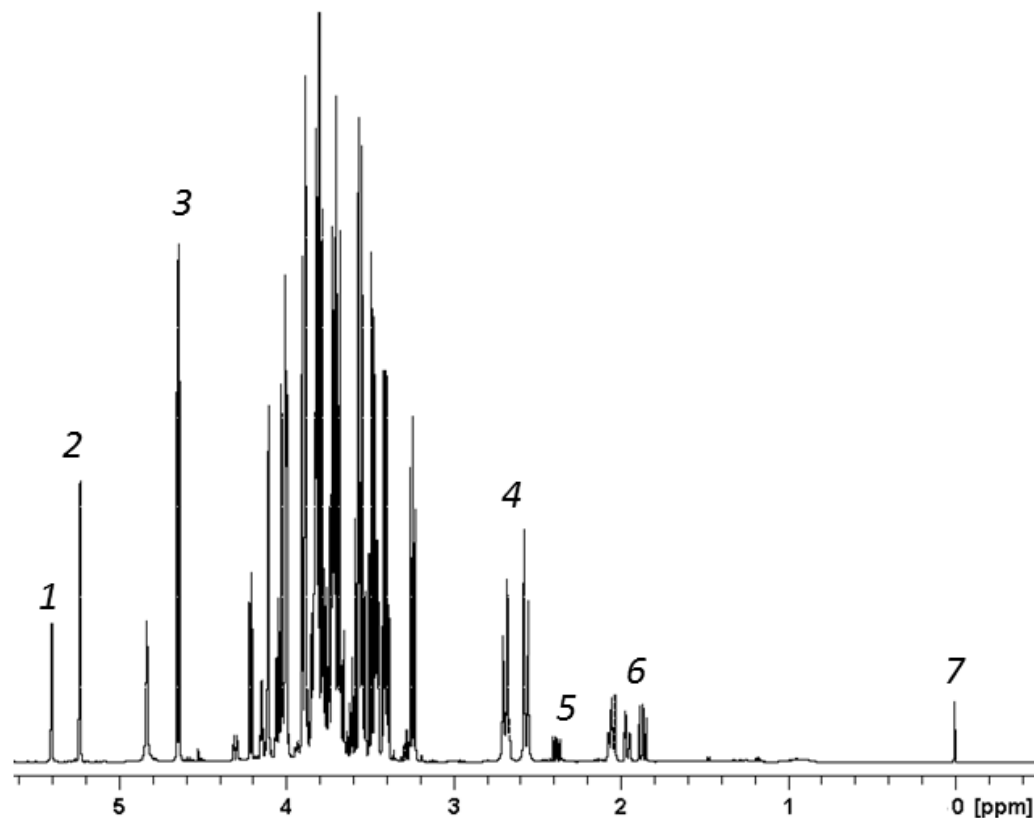

Representative  $^1\text{H}$  NMR spectrum of Kiwi Hayward aqueous extract at 25°C. The assignment of selected peaks is reported: 1: sucrose; 2:  $\alpha$ -glucose; 3:  $\beta$ -glucose; 4: citric acid; 5: malic acid; 6: quinic acid; 7: DSS- $\text{d}_6$ . The NMR-based quantification has been done for the most abundant metabolites that are sugars, and reported in milligrams of metabolites/ 100 grams of homogenized fruit powder. Sucrose: 1030 mg/100 g; Glucose: 3594 mg/100 g; Fructose: 3355 mg/100 g.

# Carrot

**A**

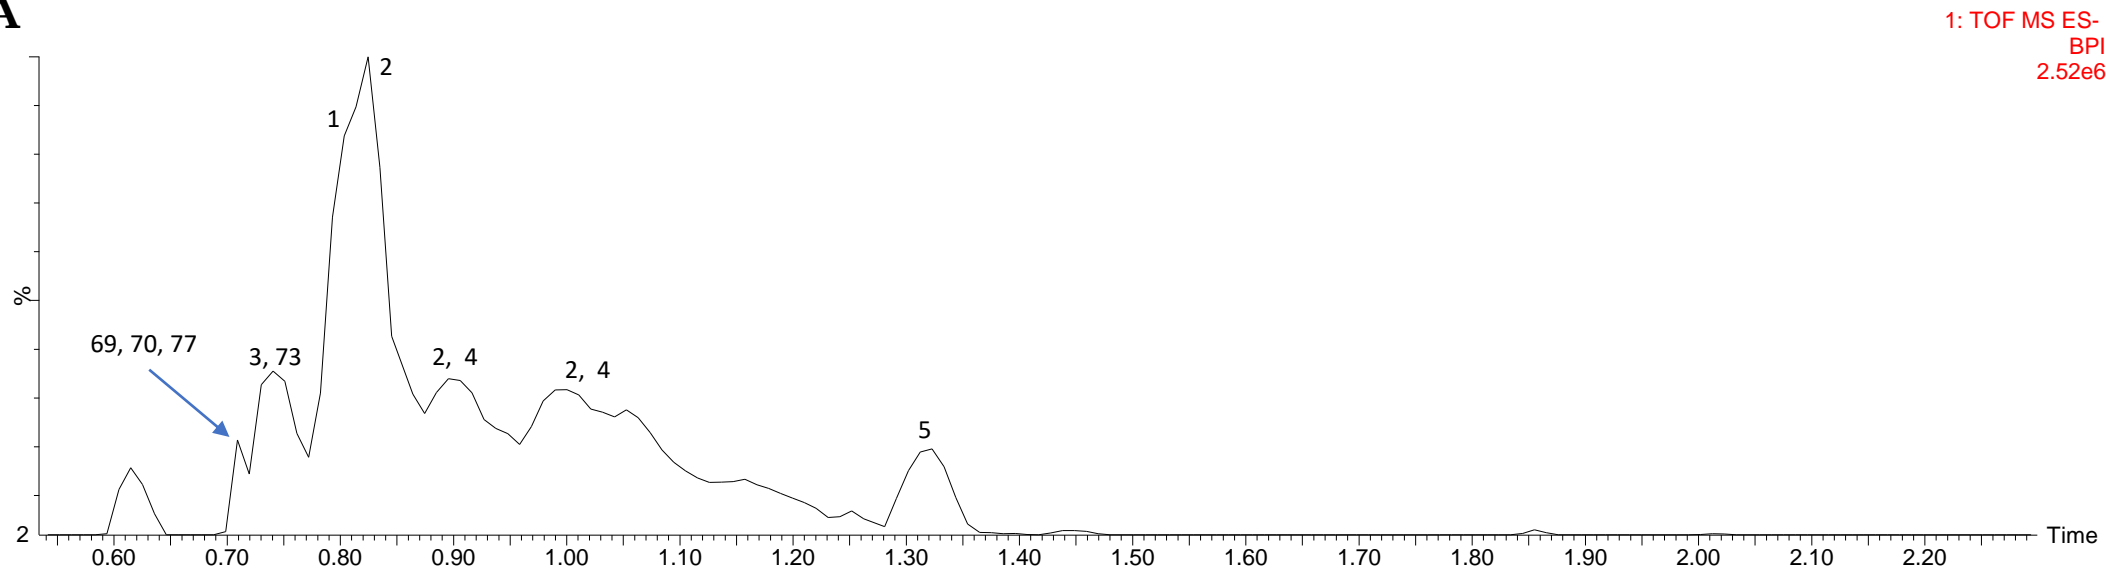

**B**

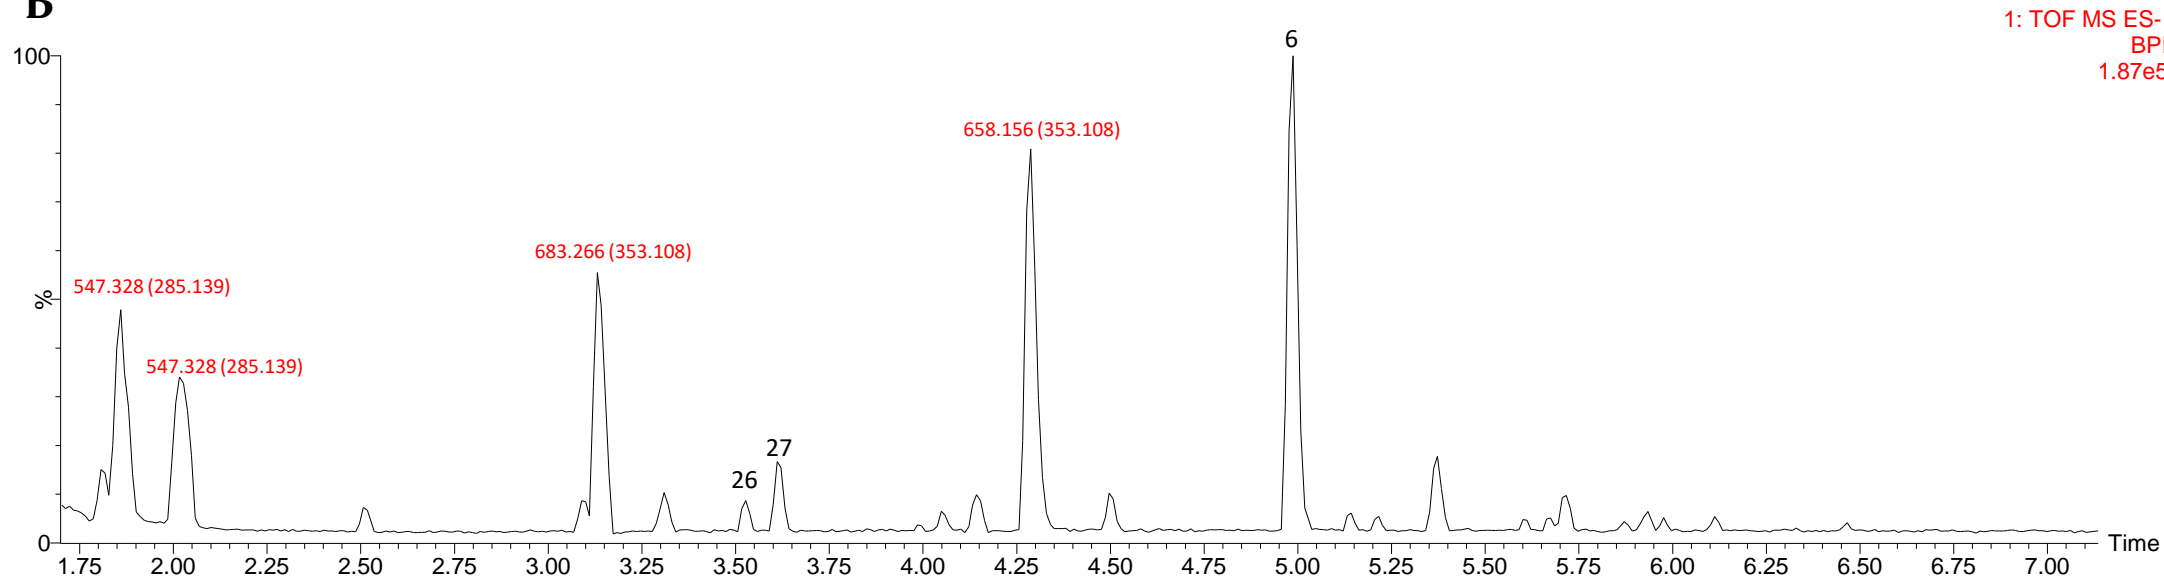

# Cucumber

**A**

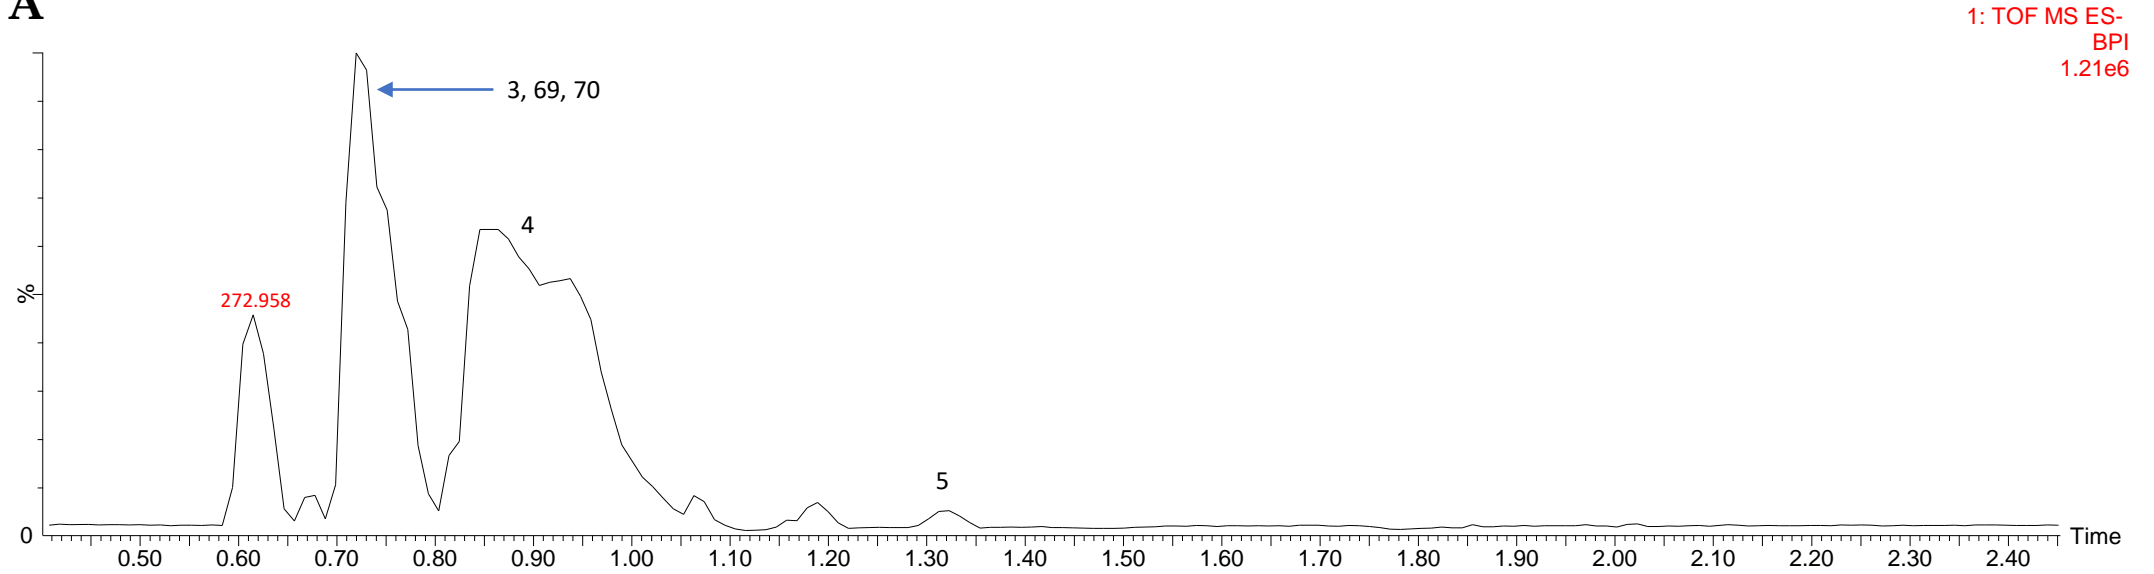

**B**

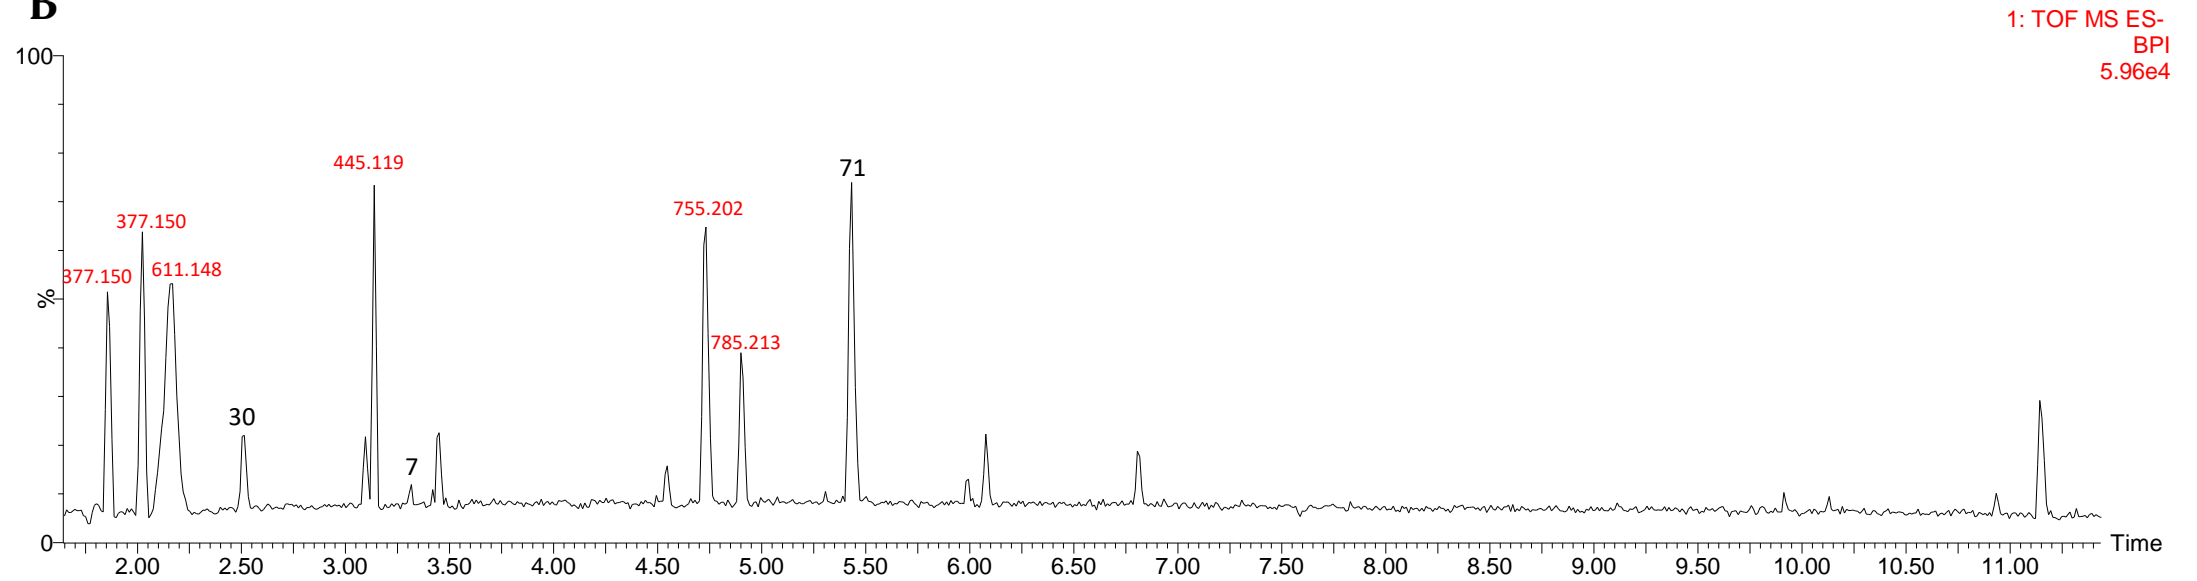

# Cherry cv. Black Star

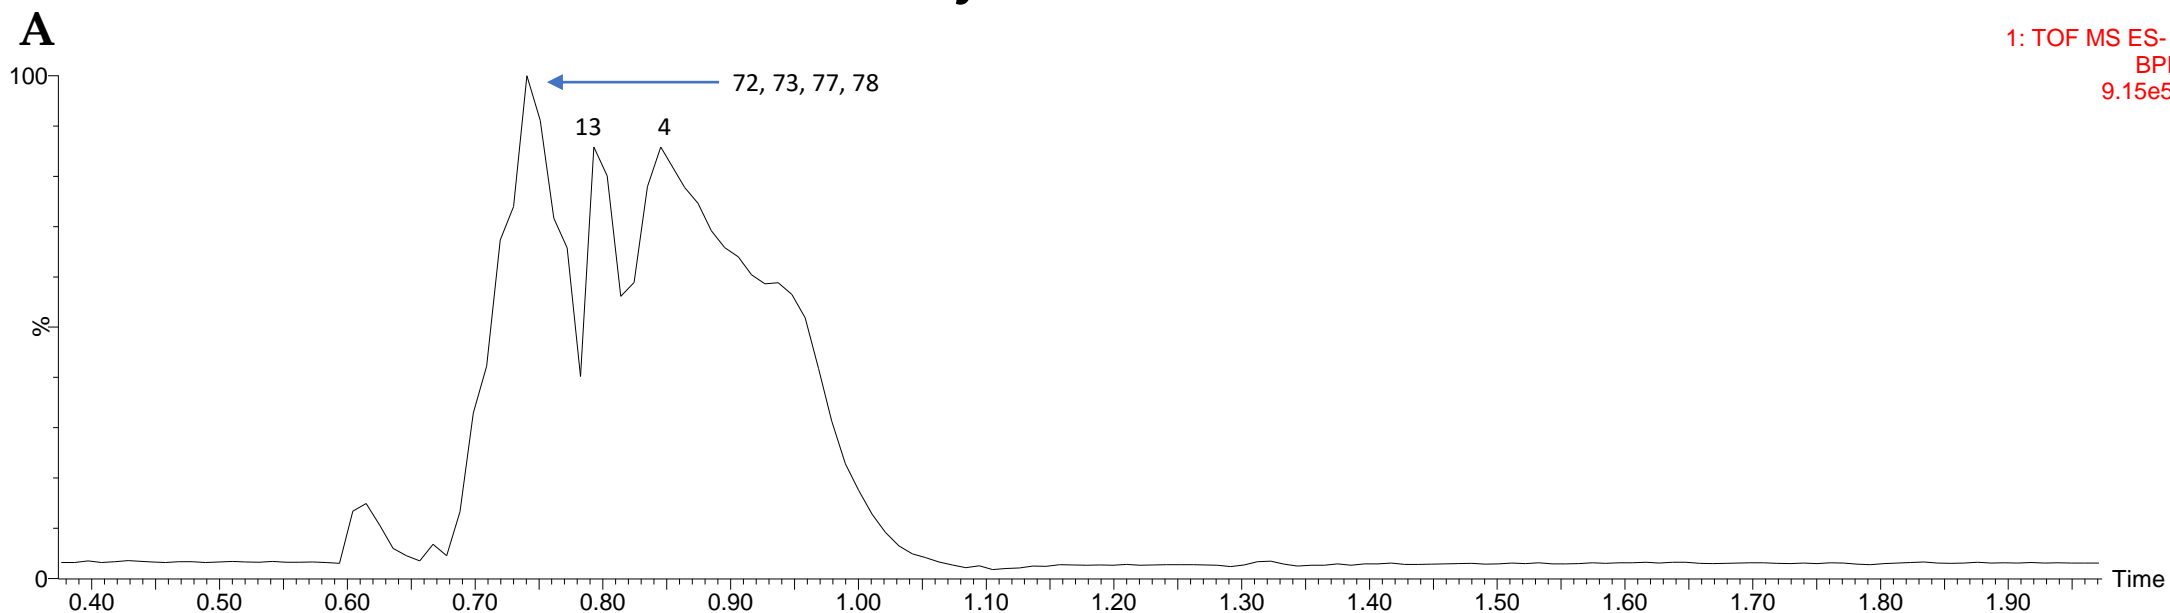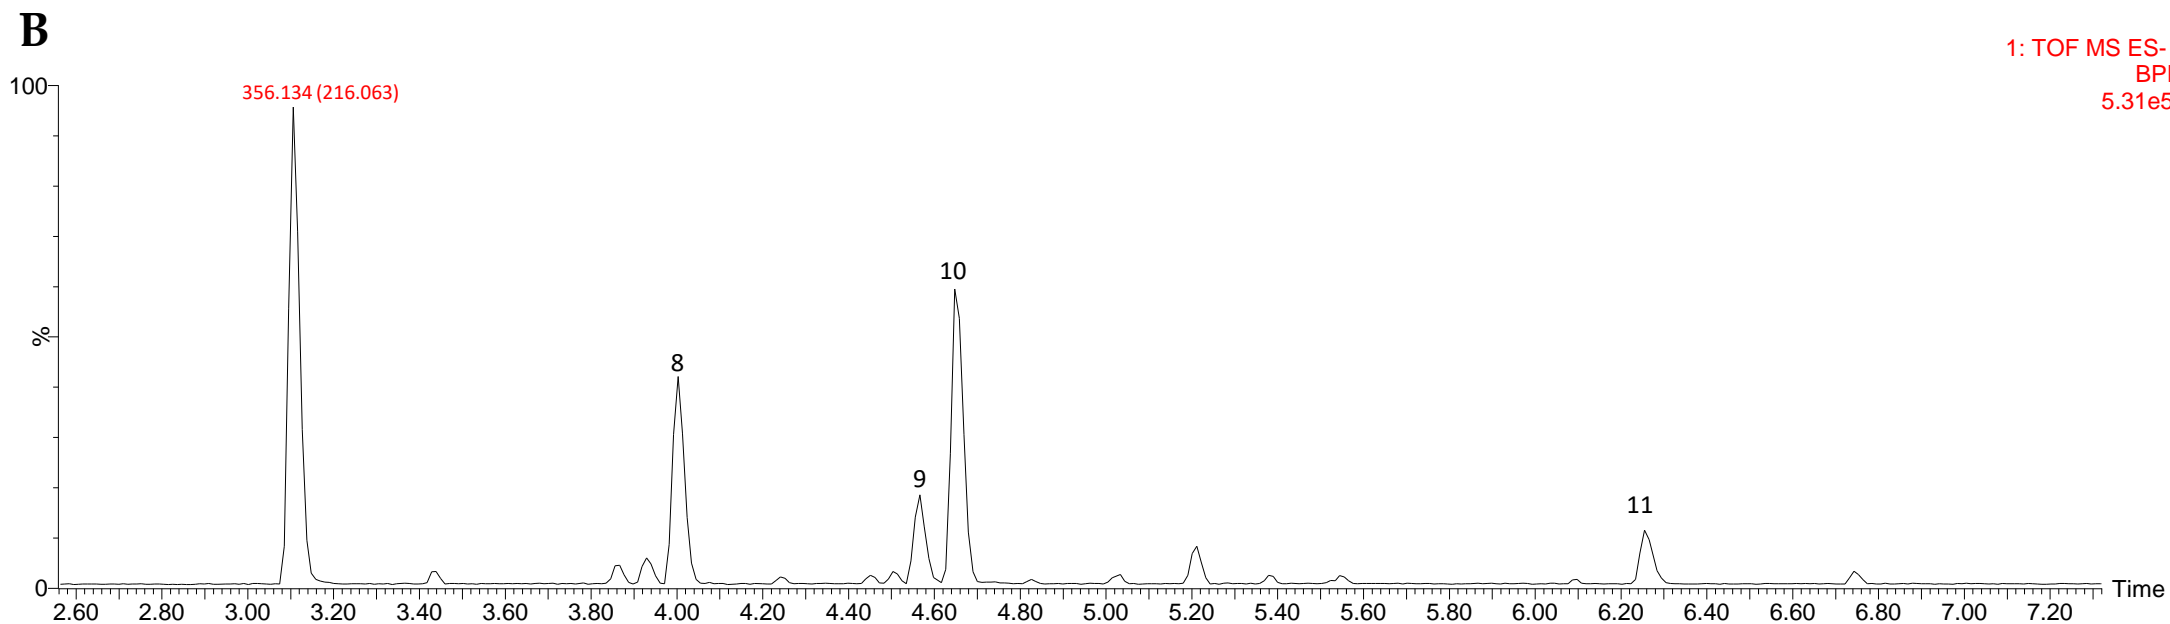

# Cherry cv. Roana

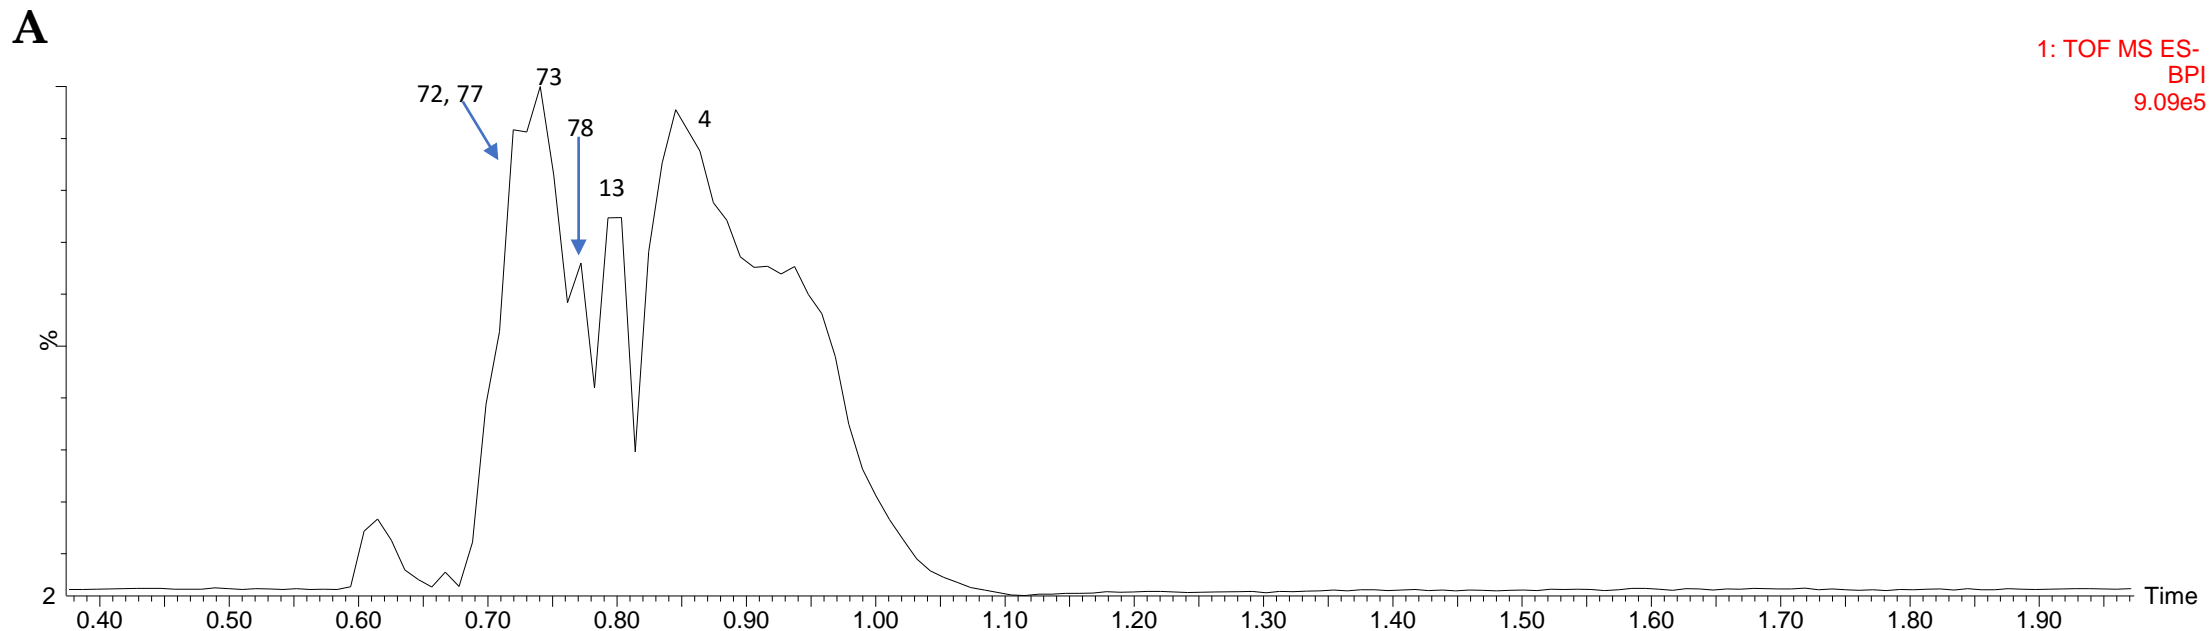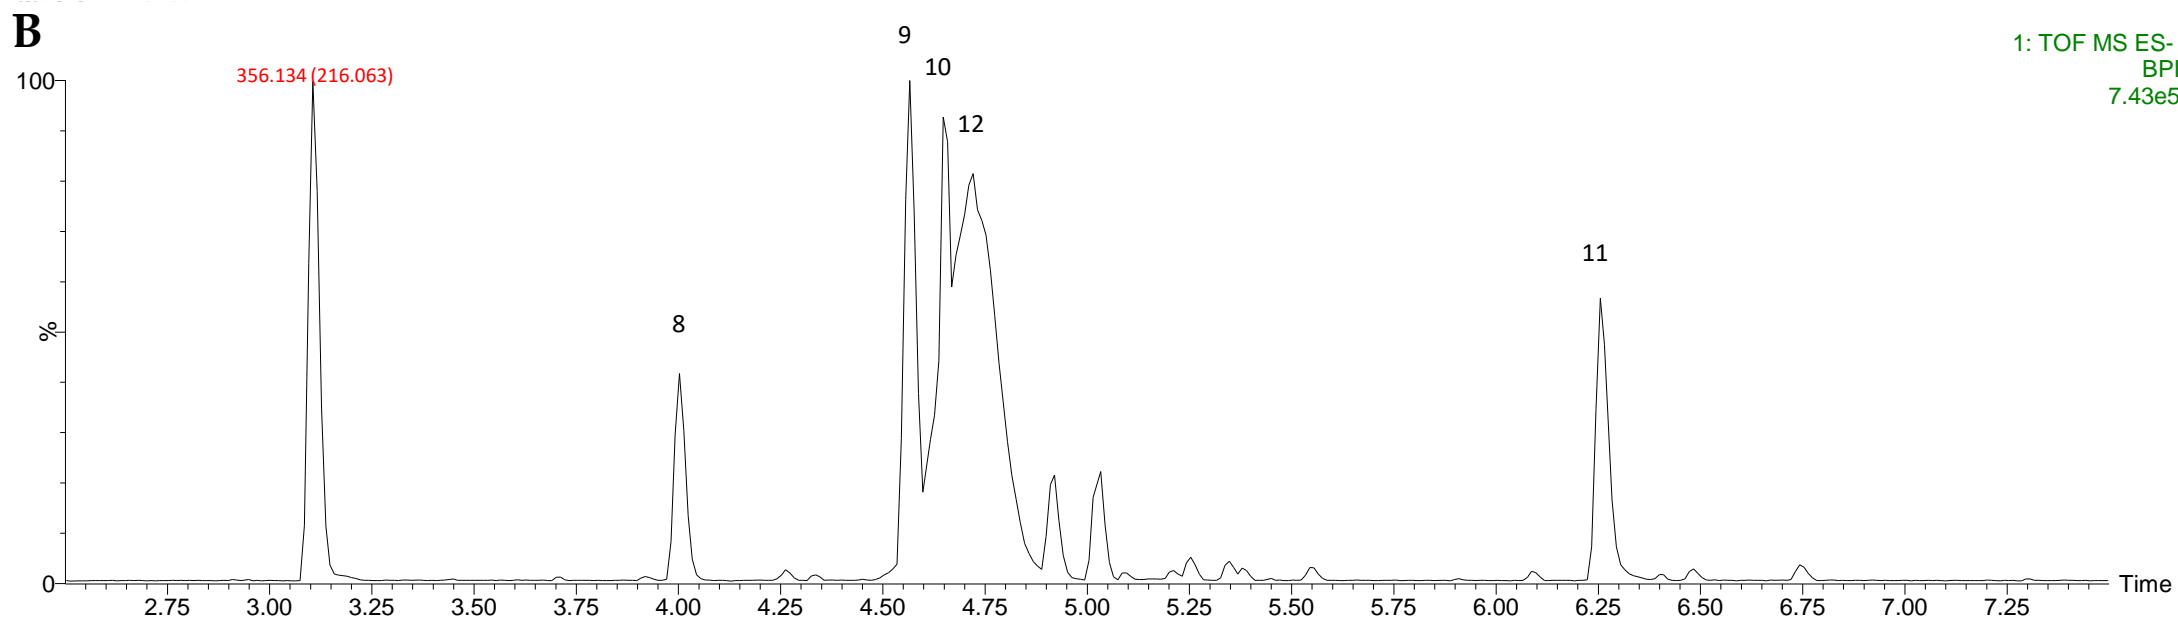

# Onion

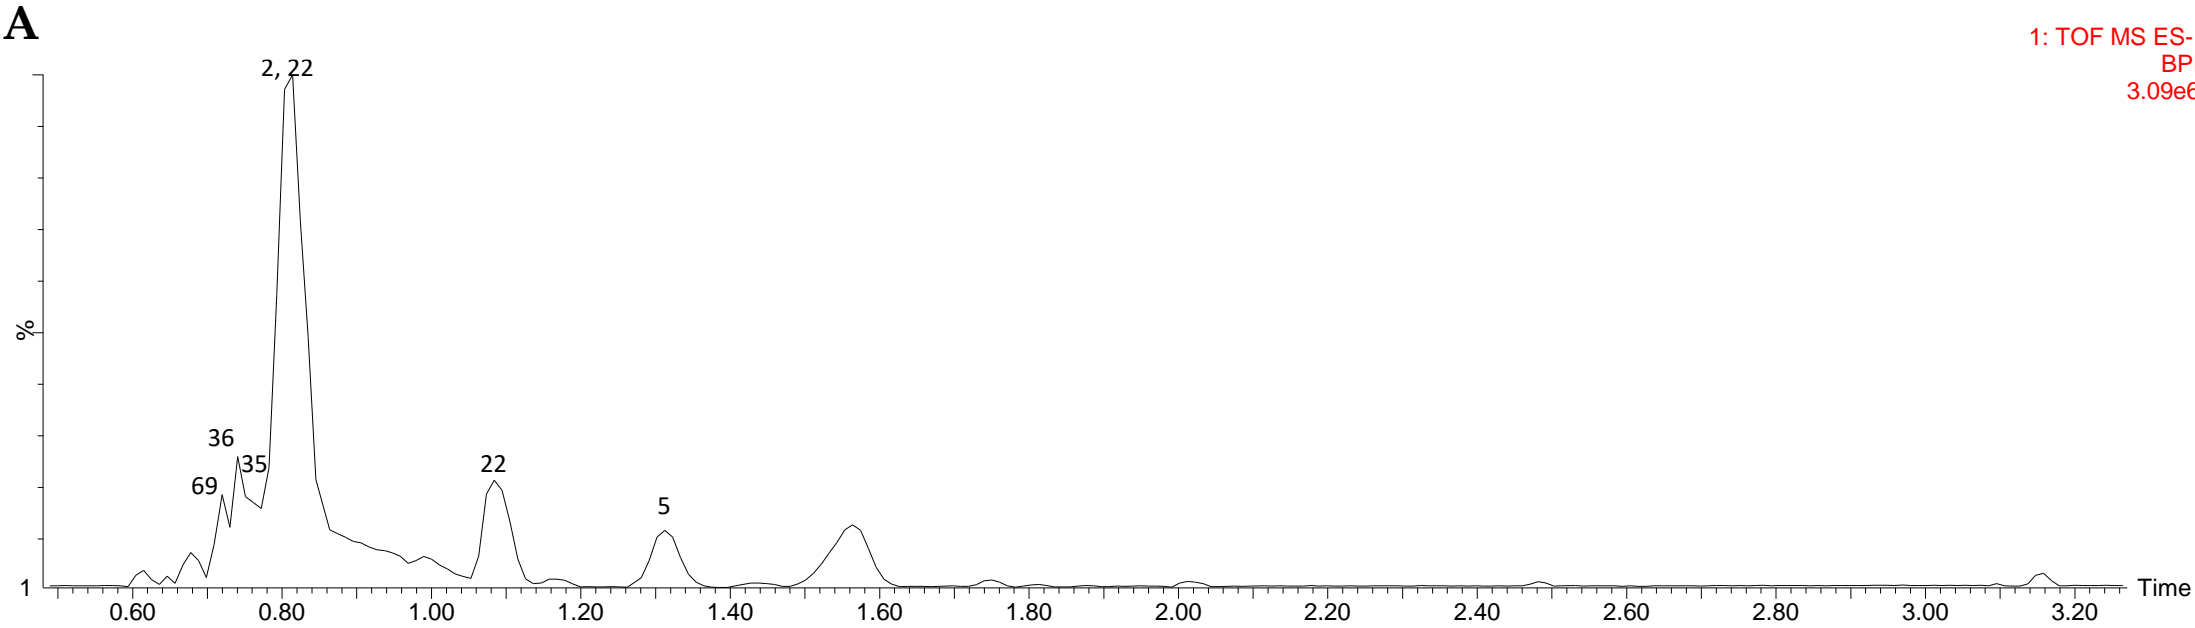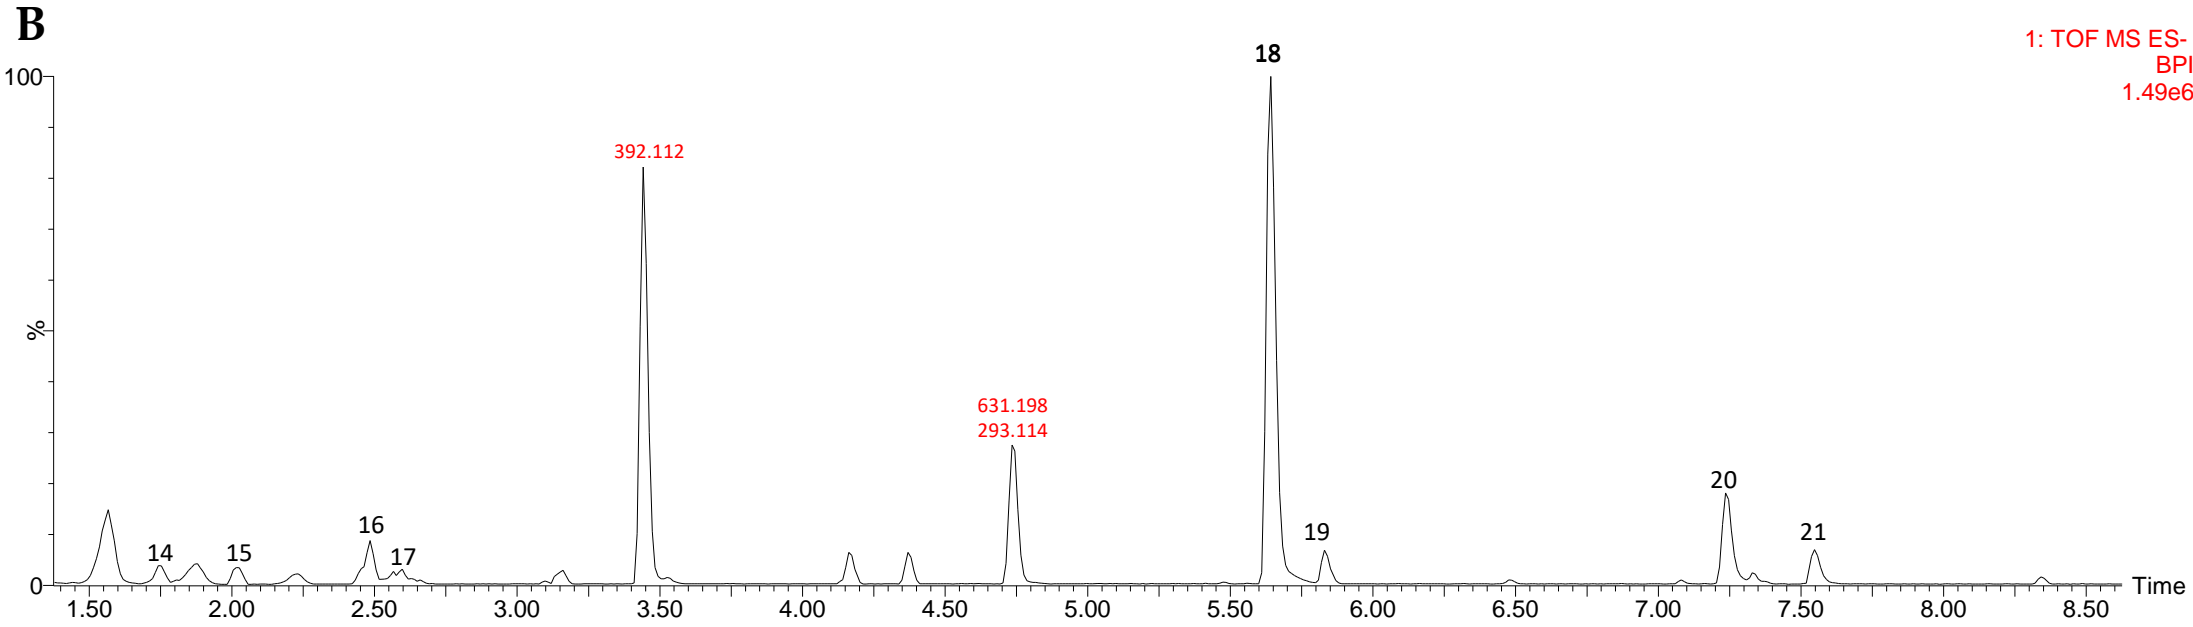

# Shallot

**A**

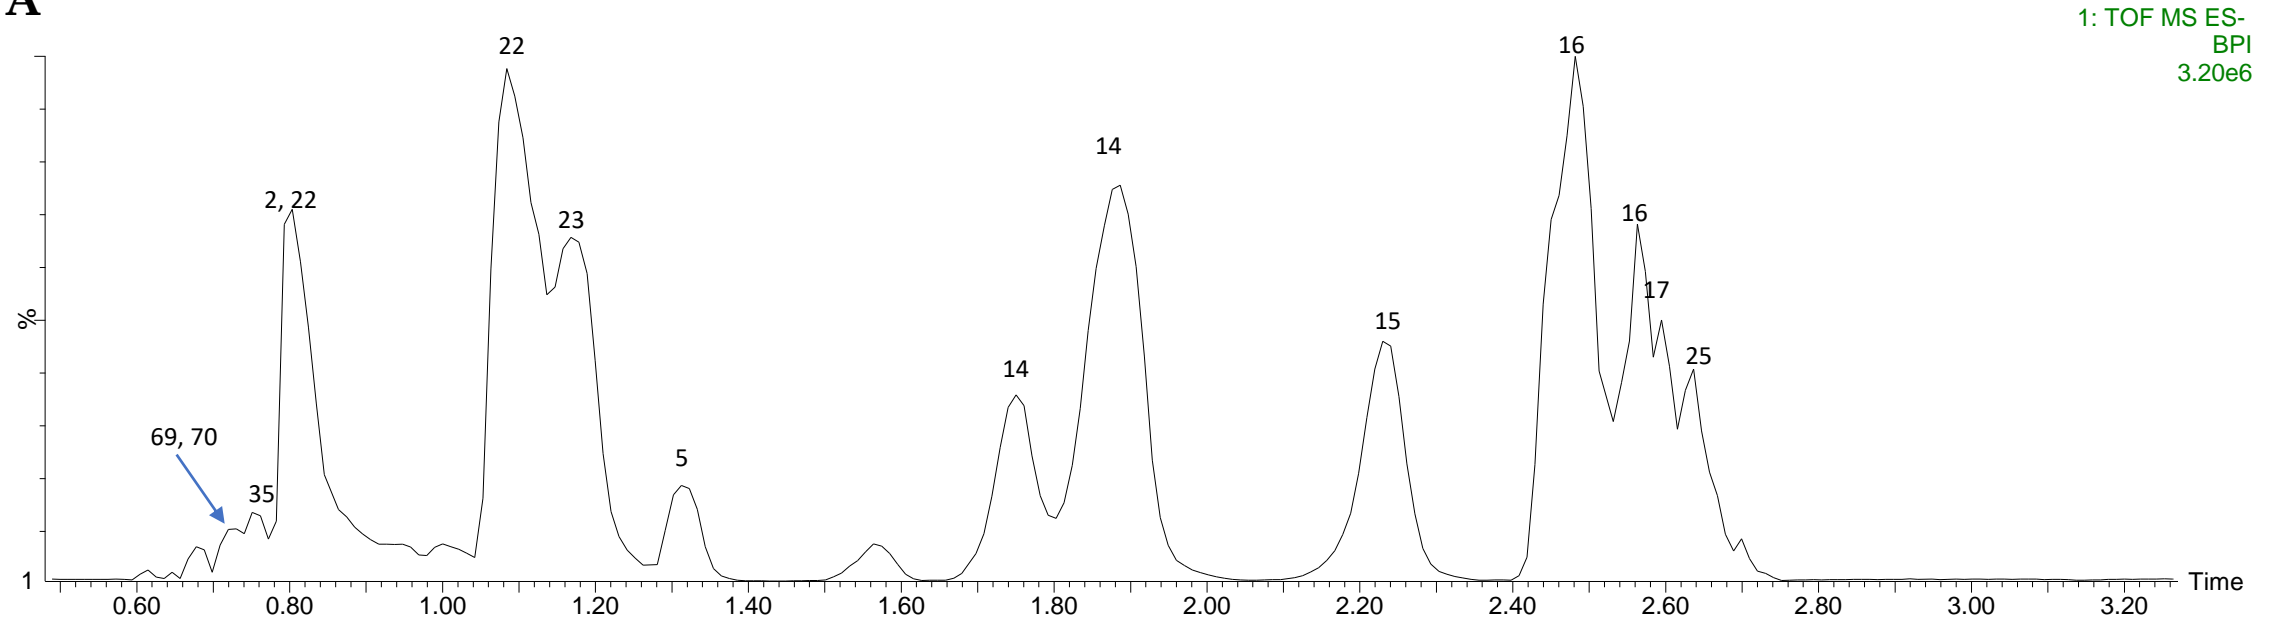

**B**

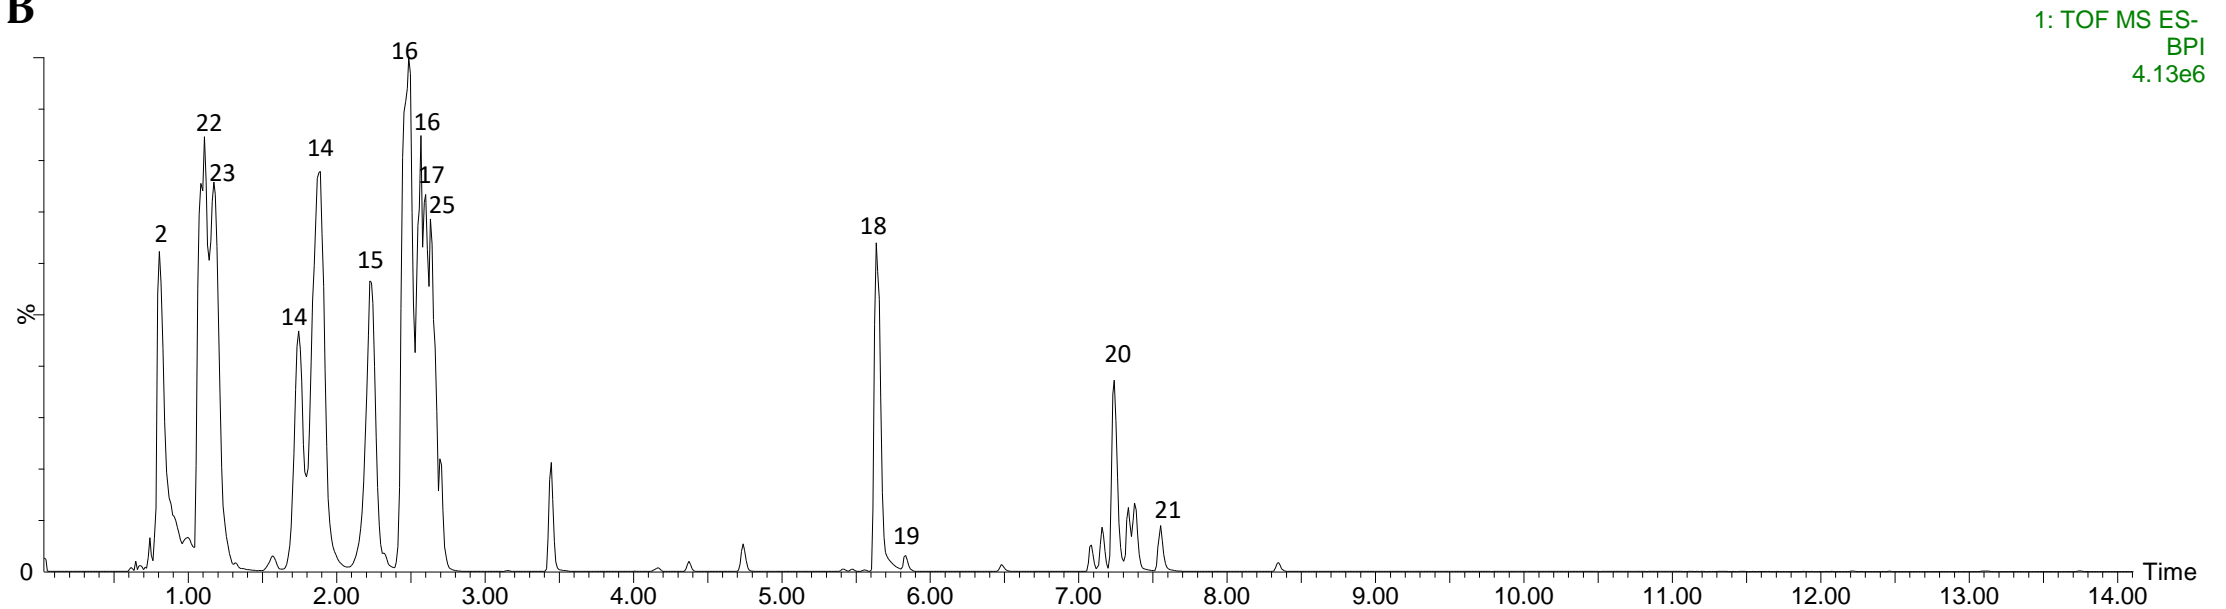



# Fennel

**A**

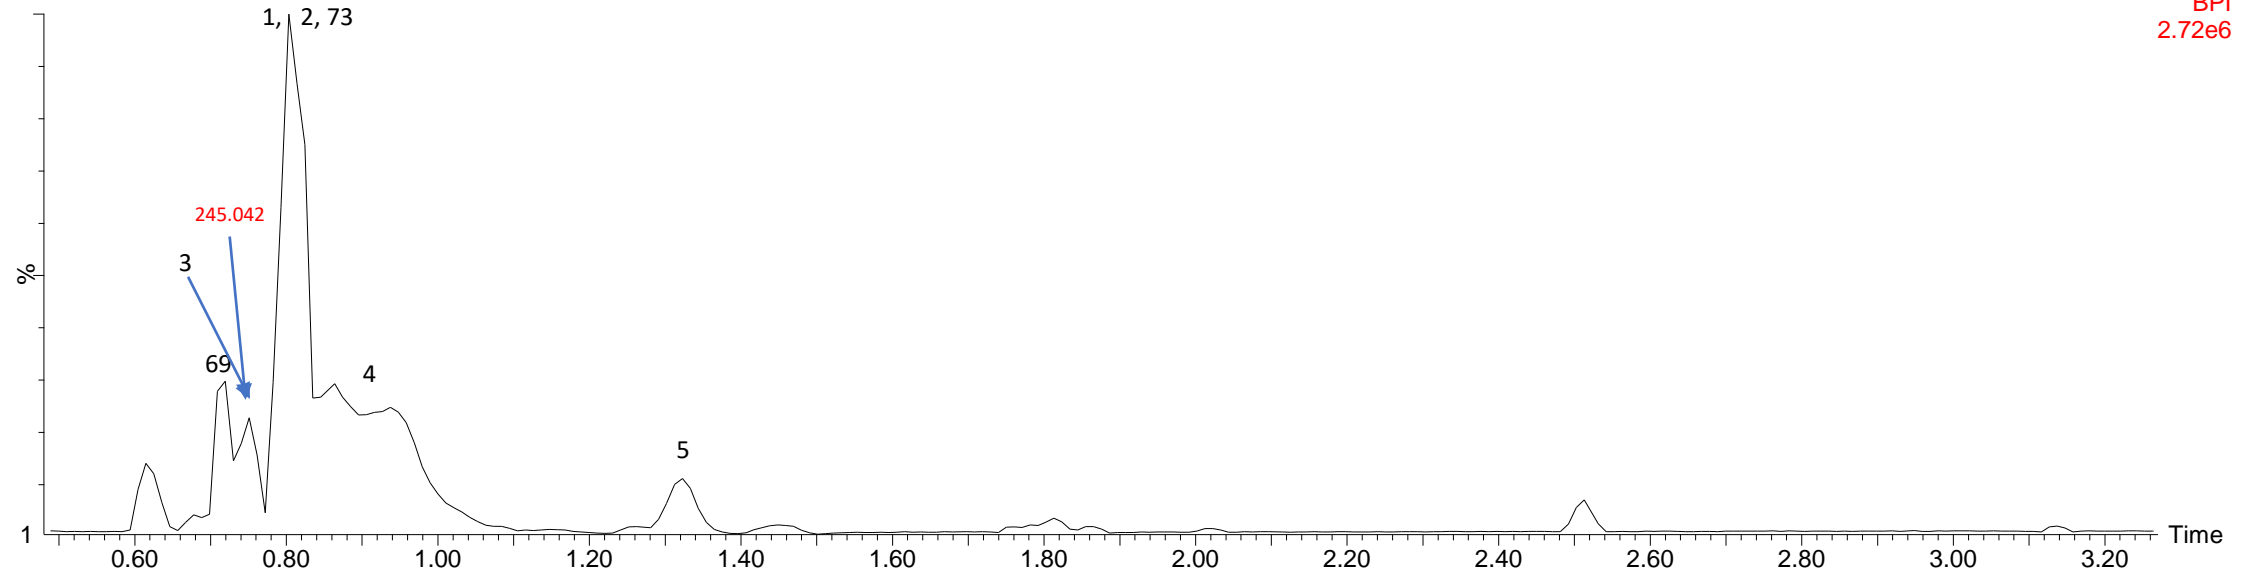

**B**

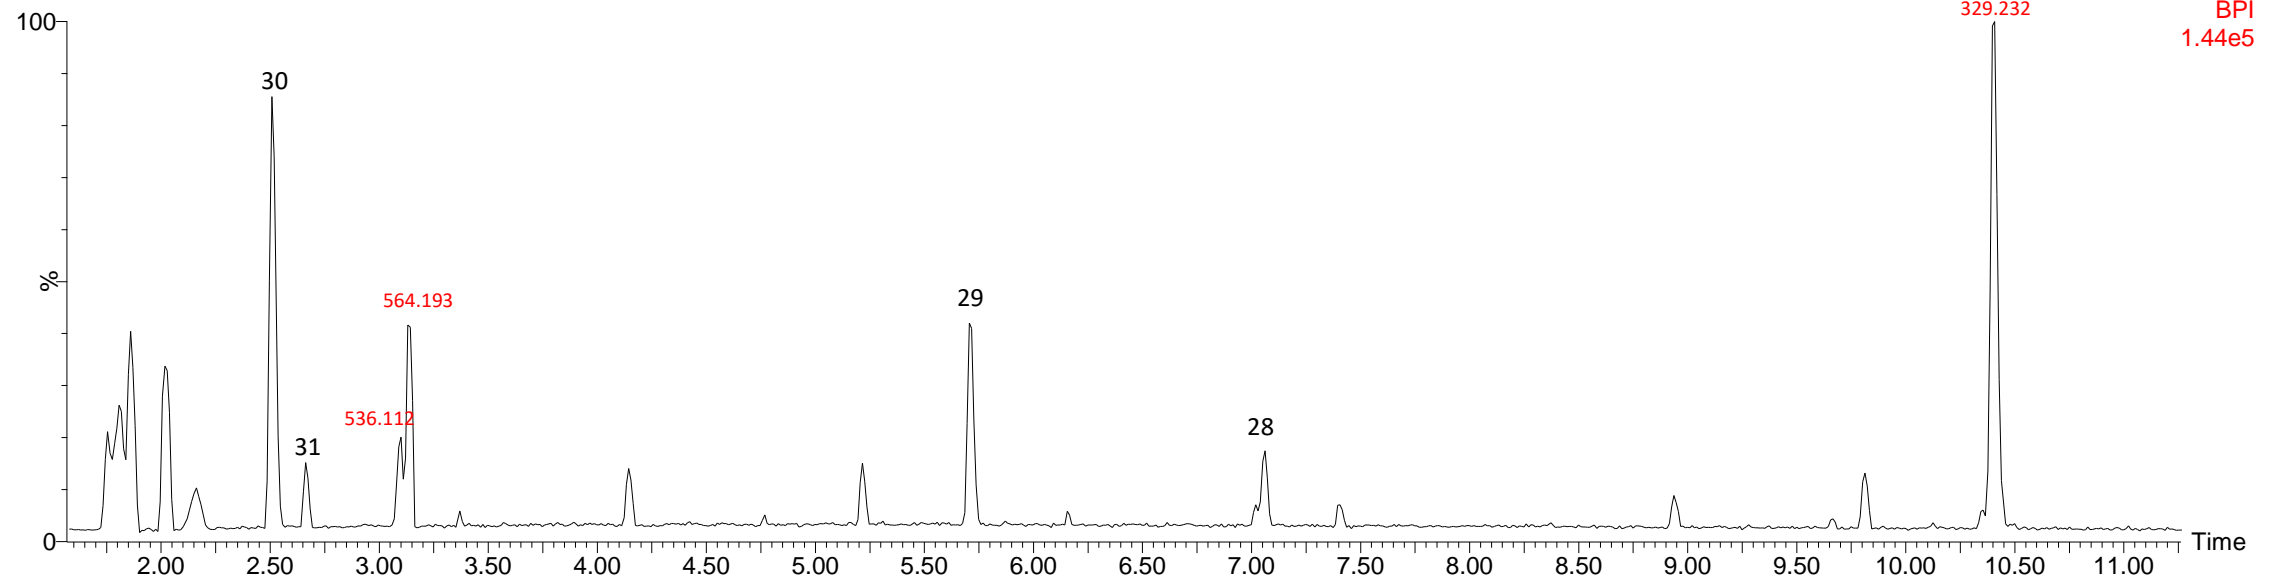

# Kiwifruit

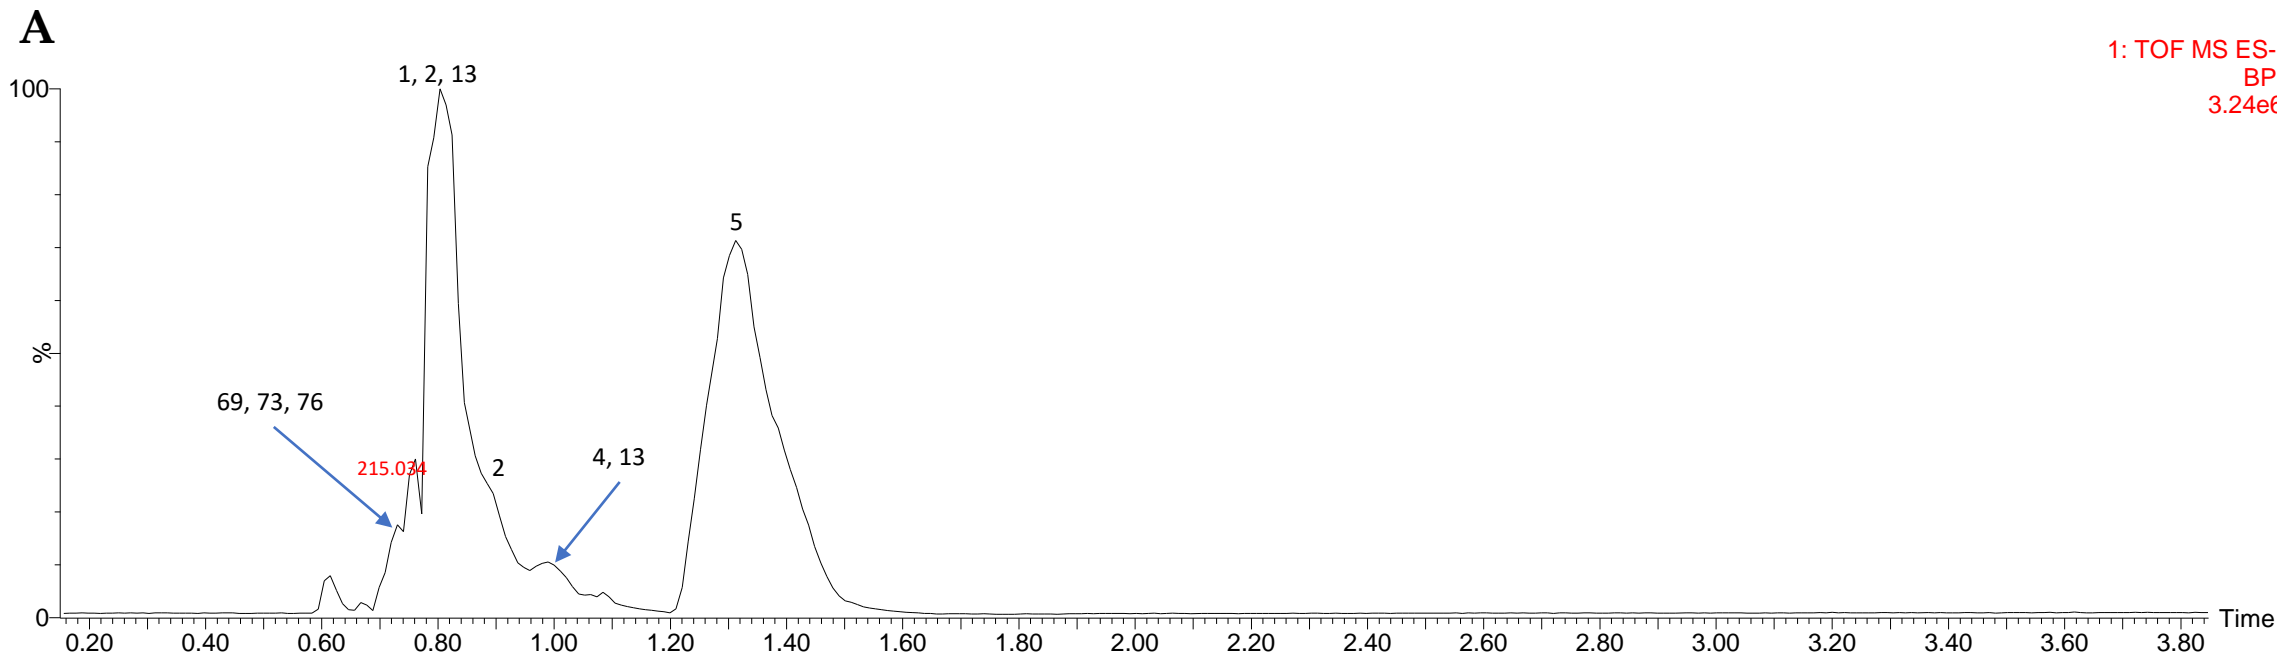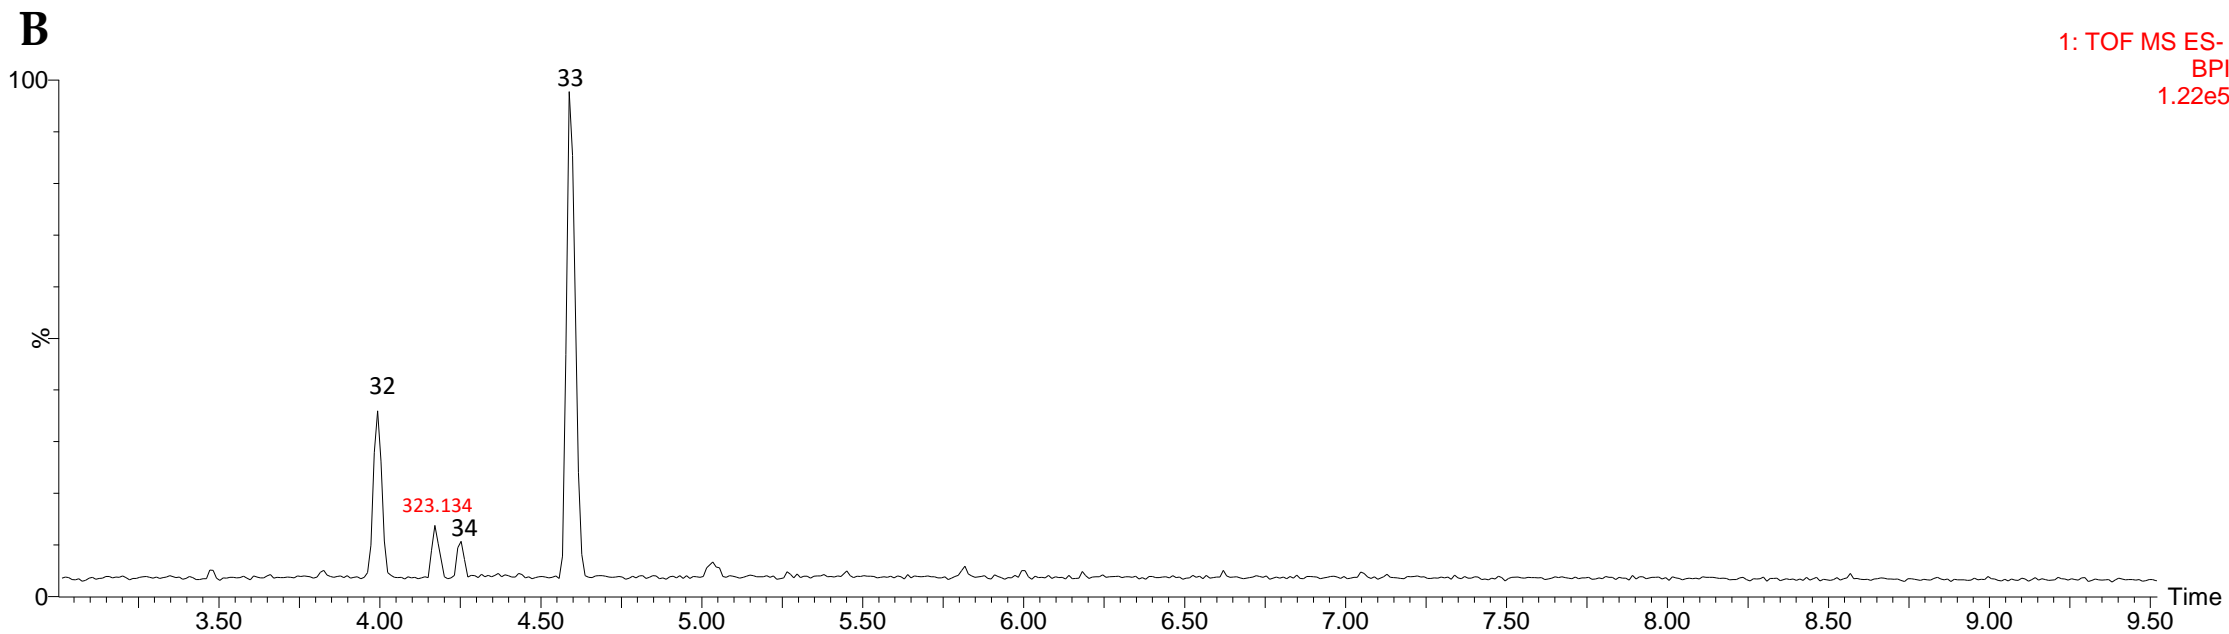

# Lettuce

**A**

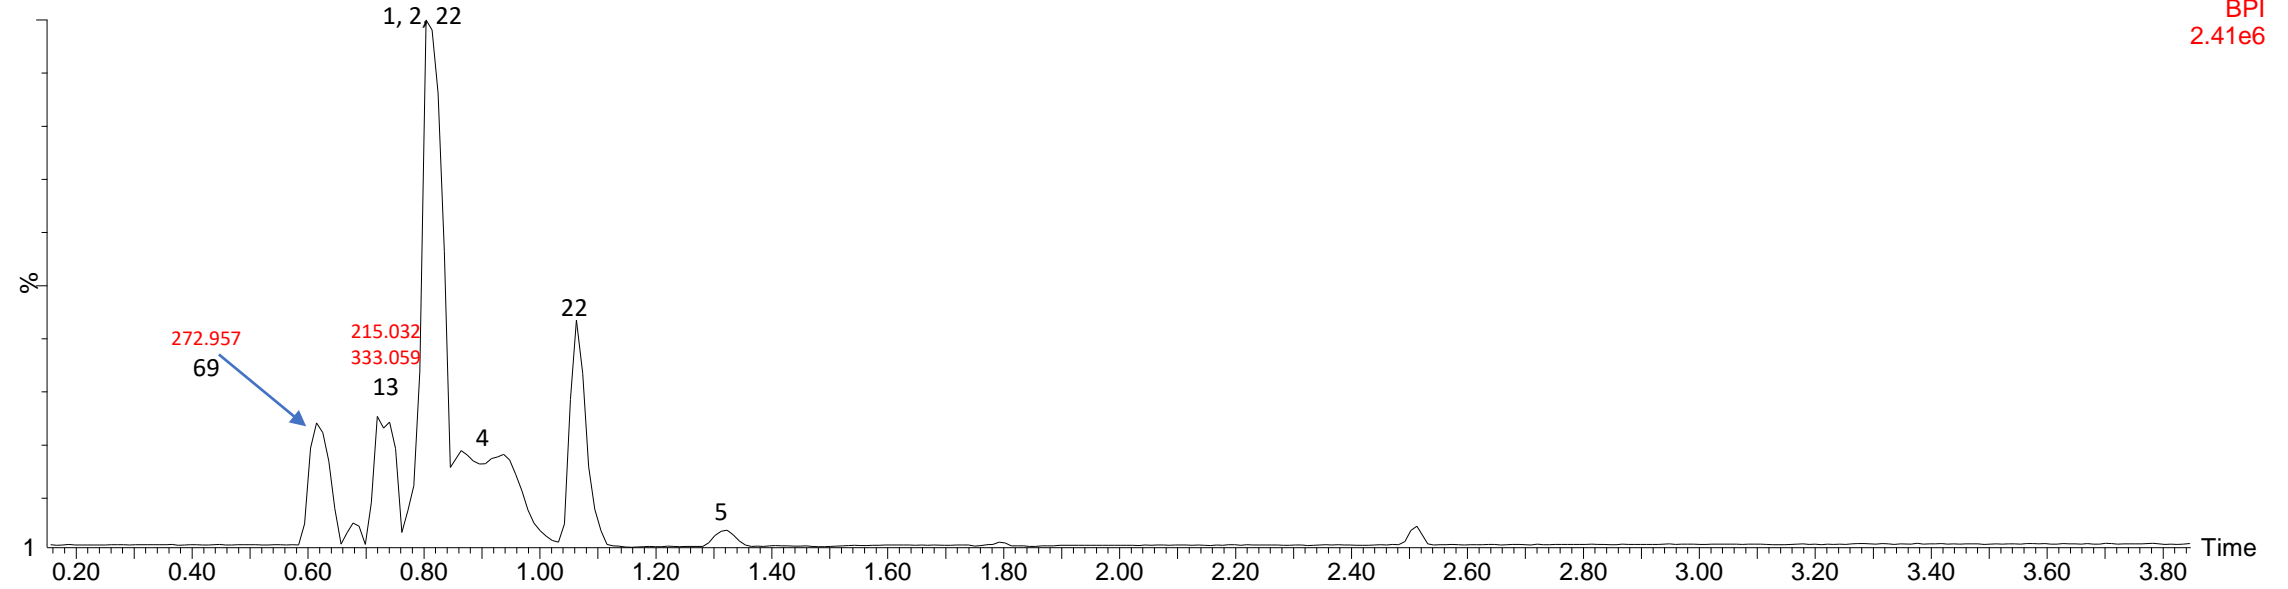

**B**

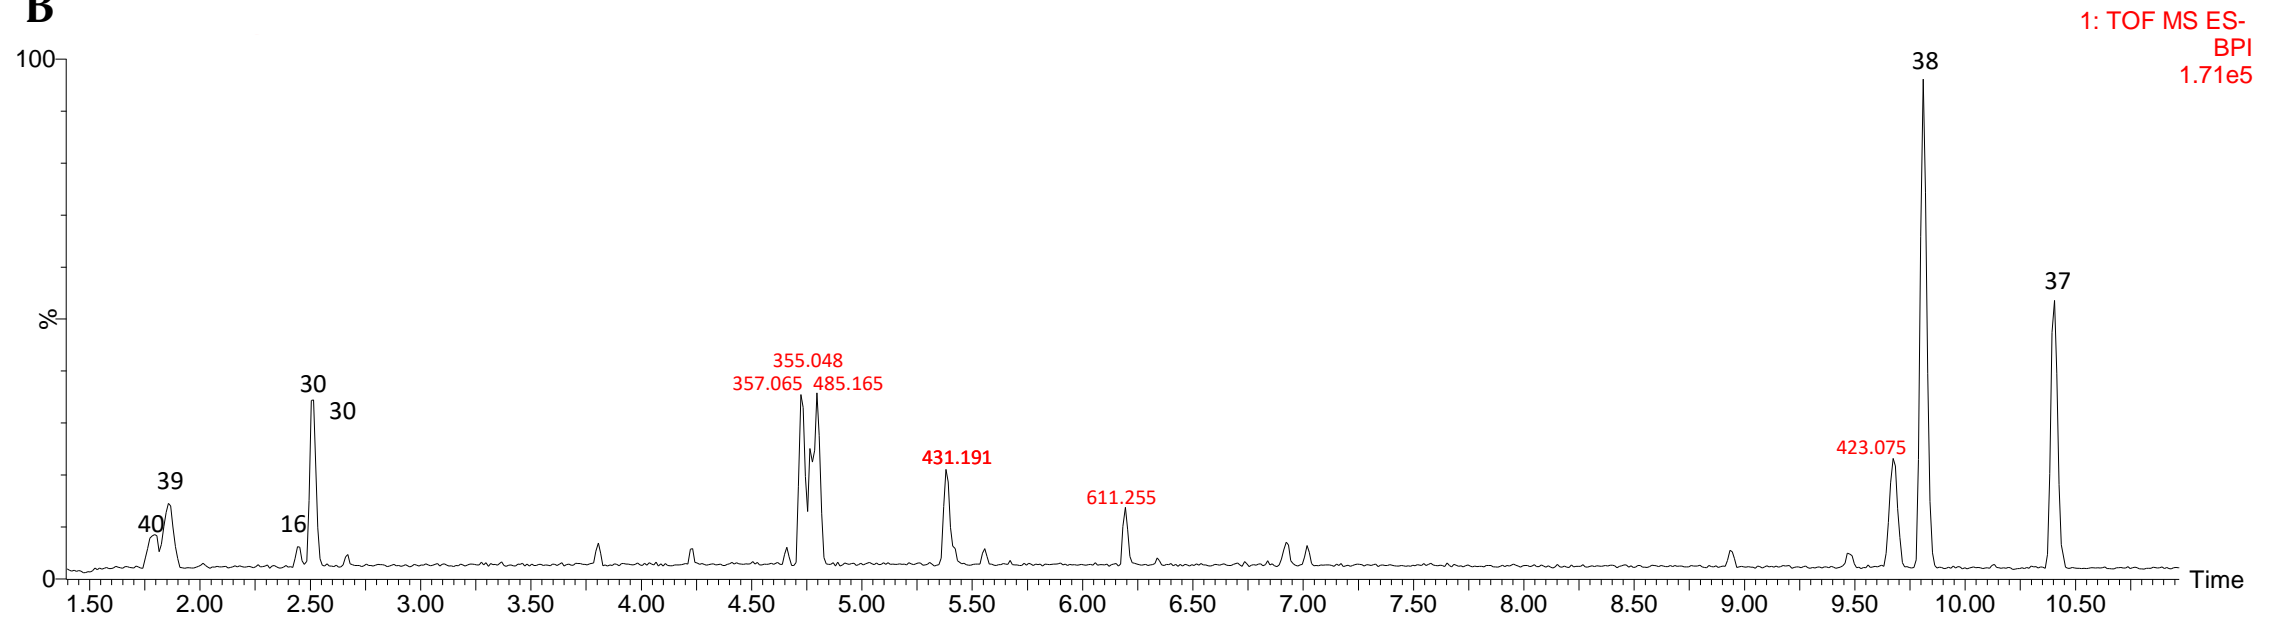

# Red chicory

**A**

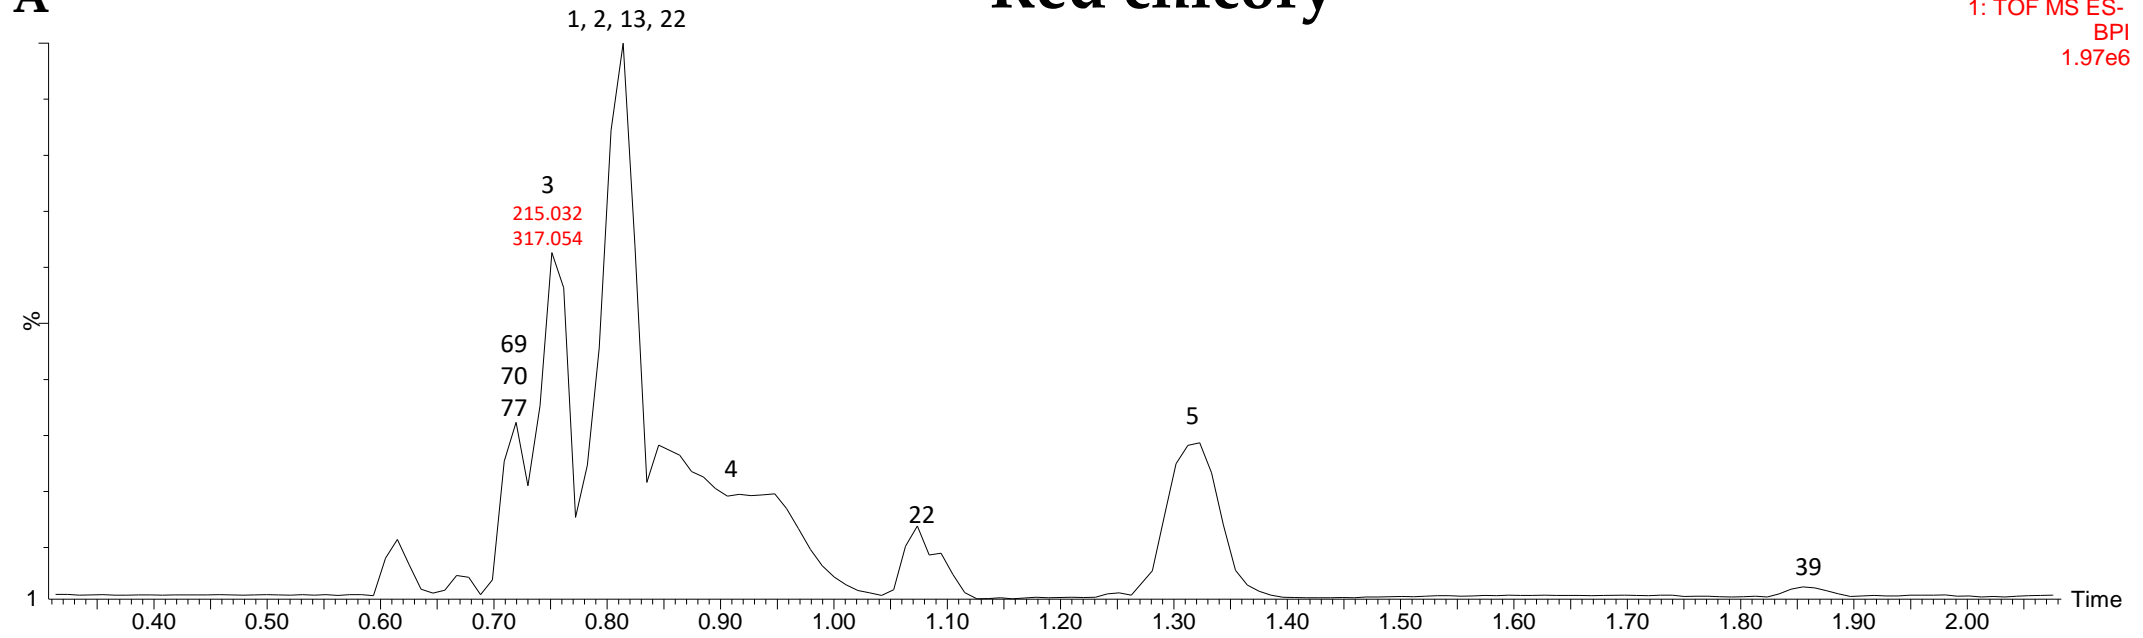

**B**

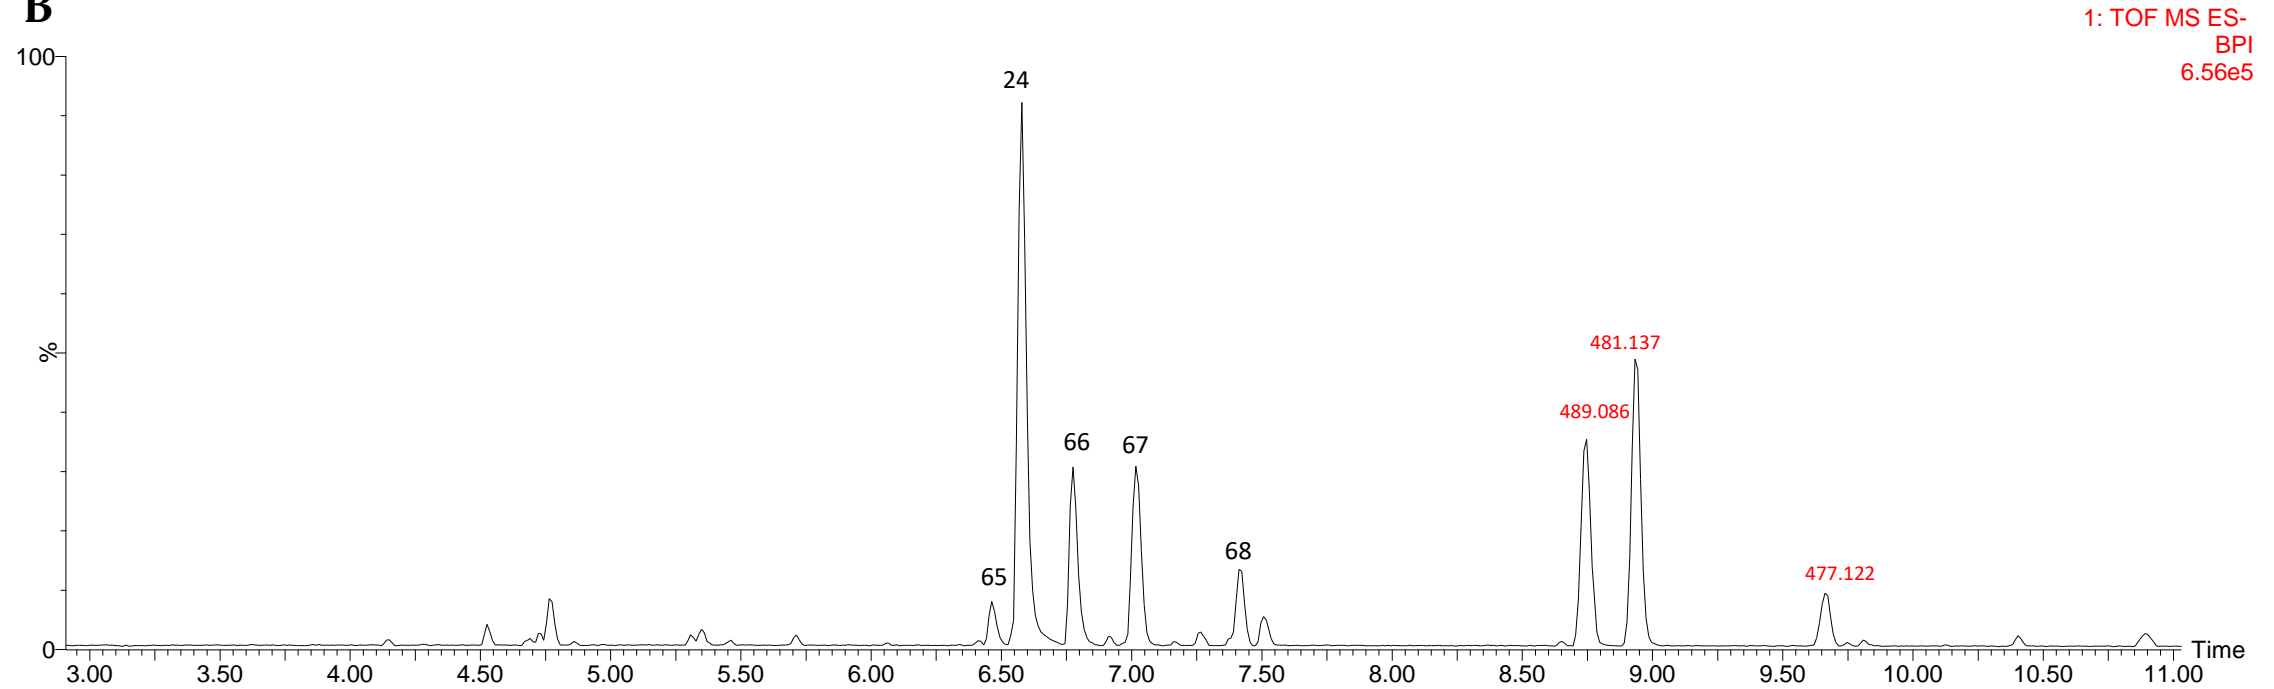

# Apple cv. Golden

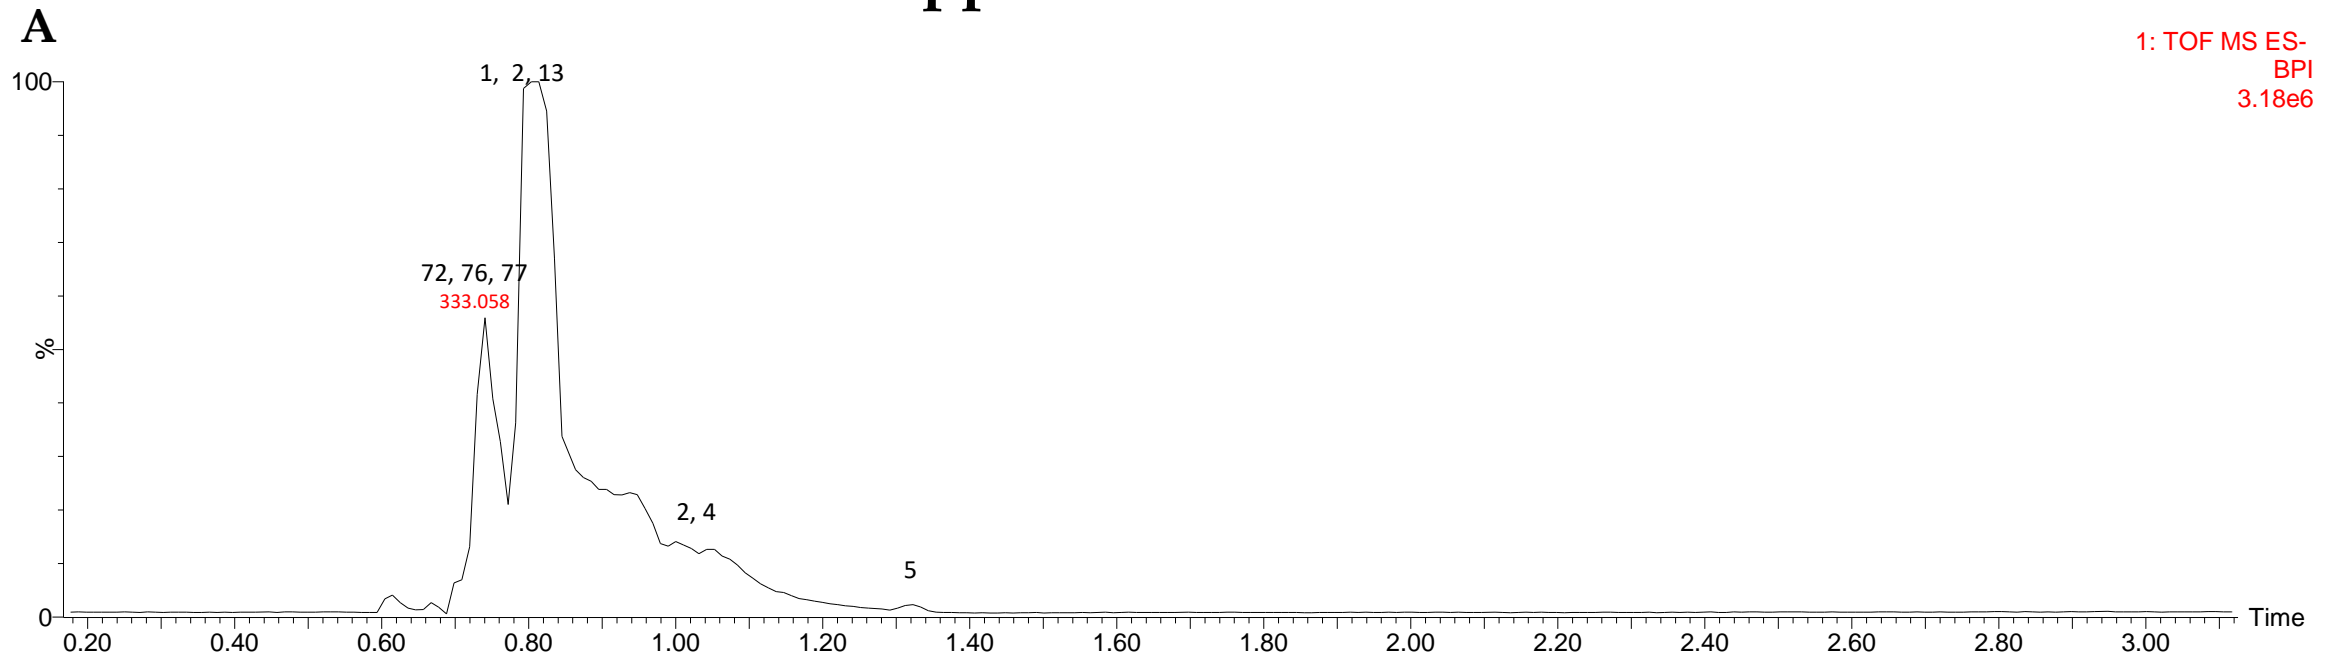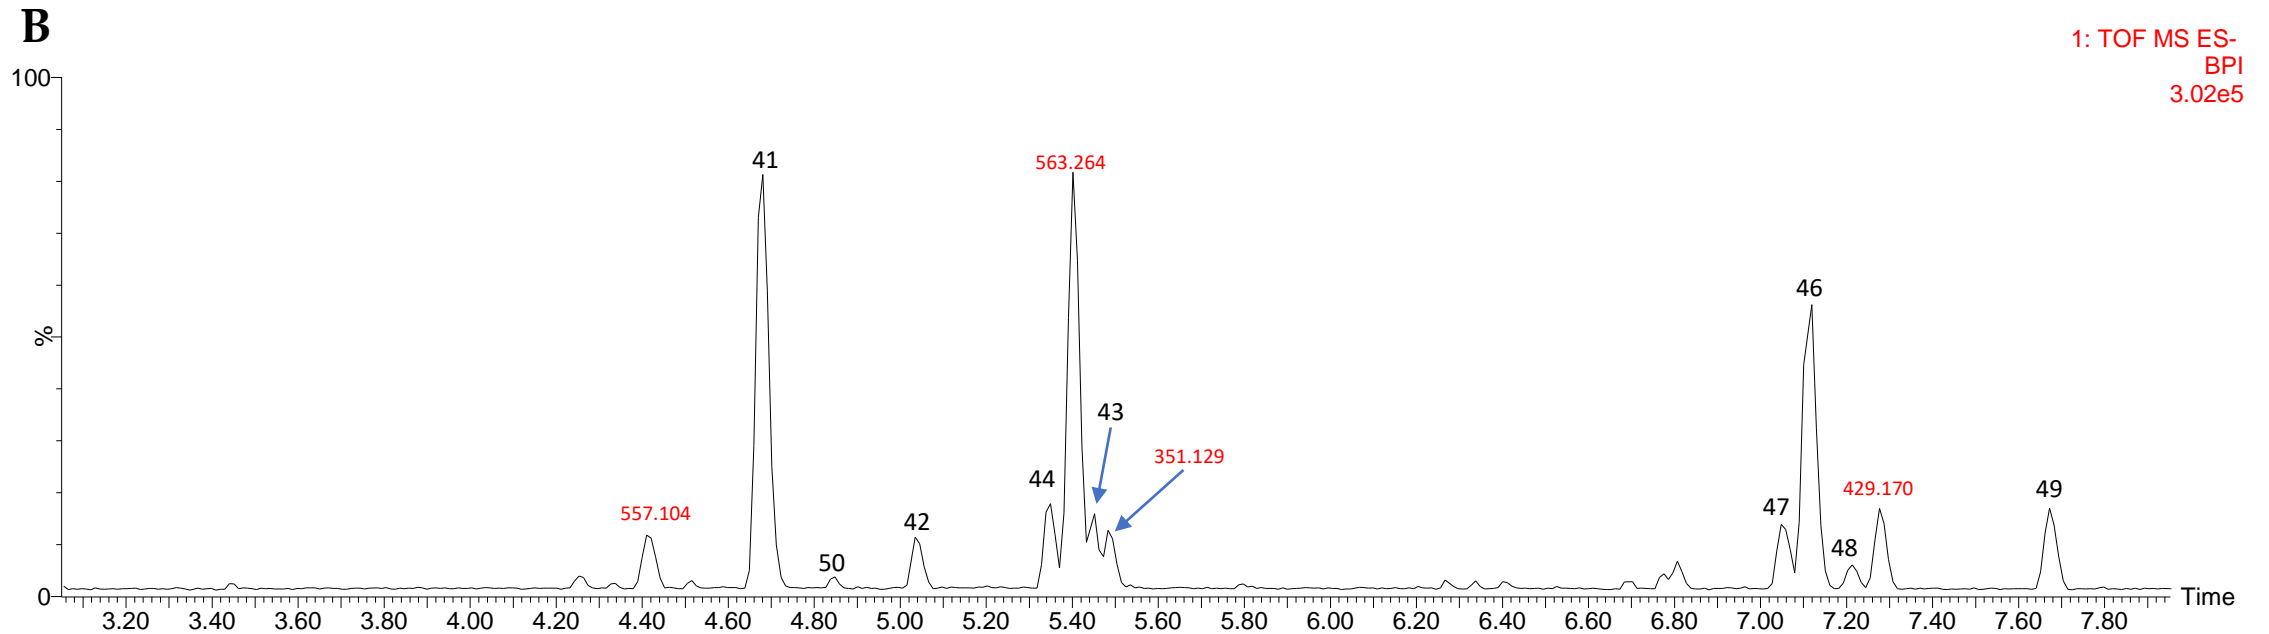

# Apple cv. Prussian

**A**

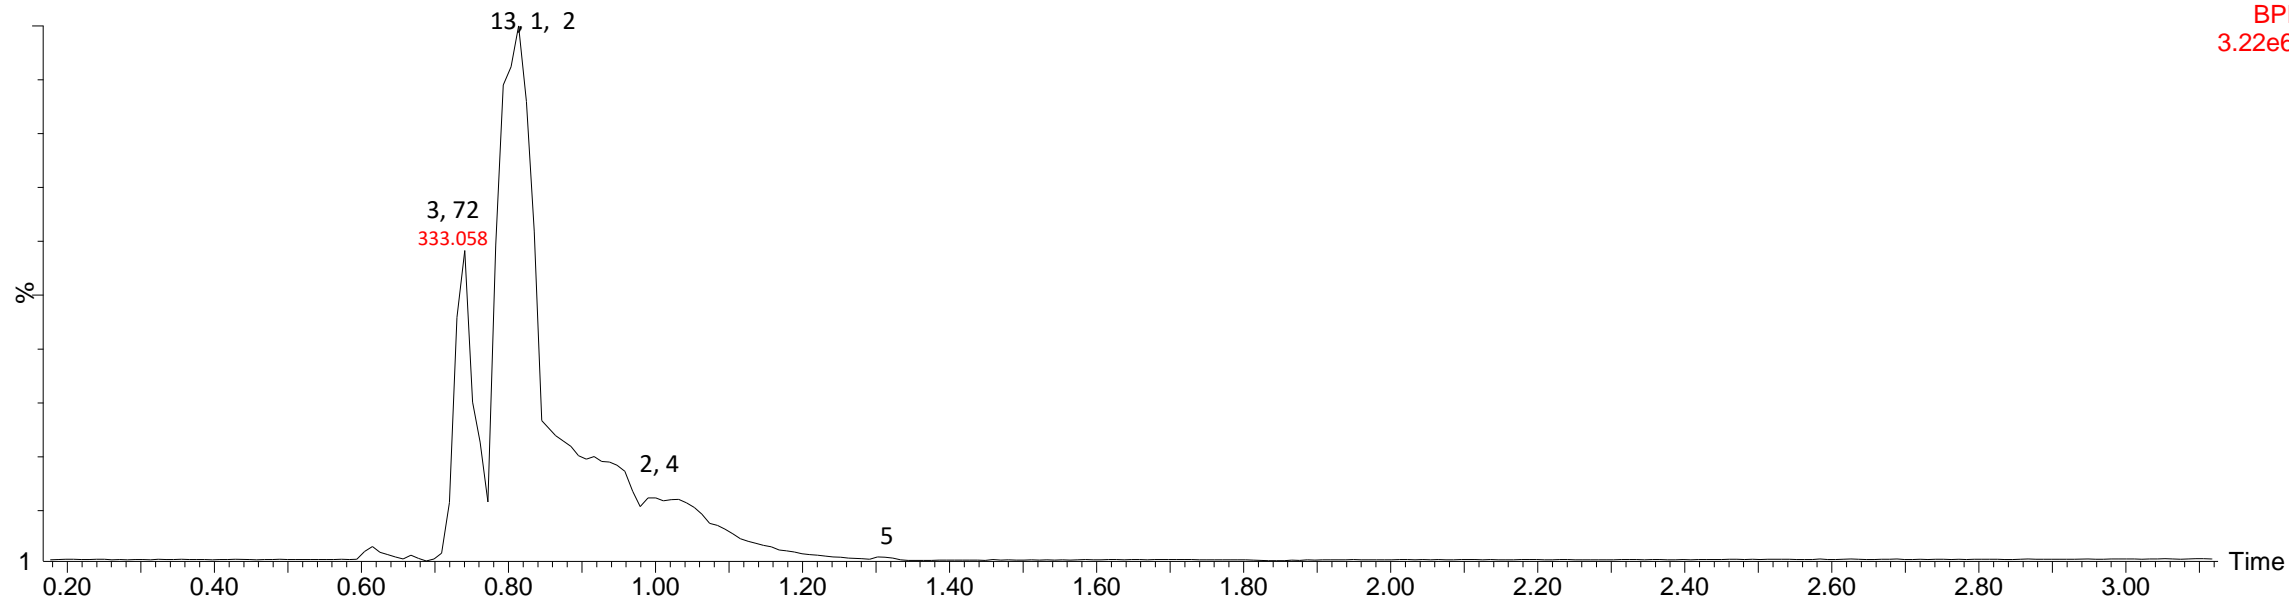

**B**

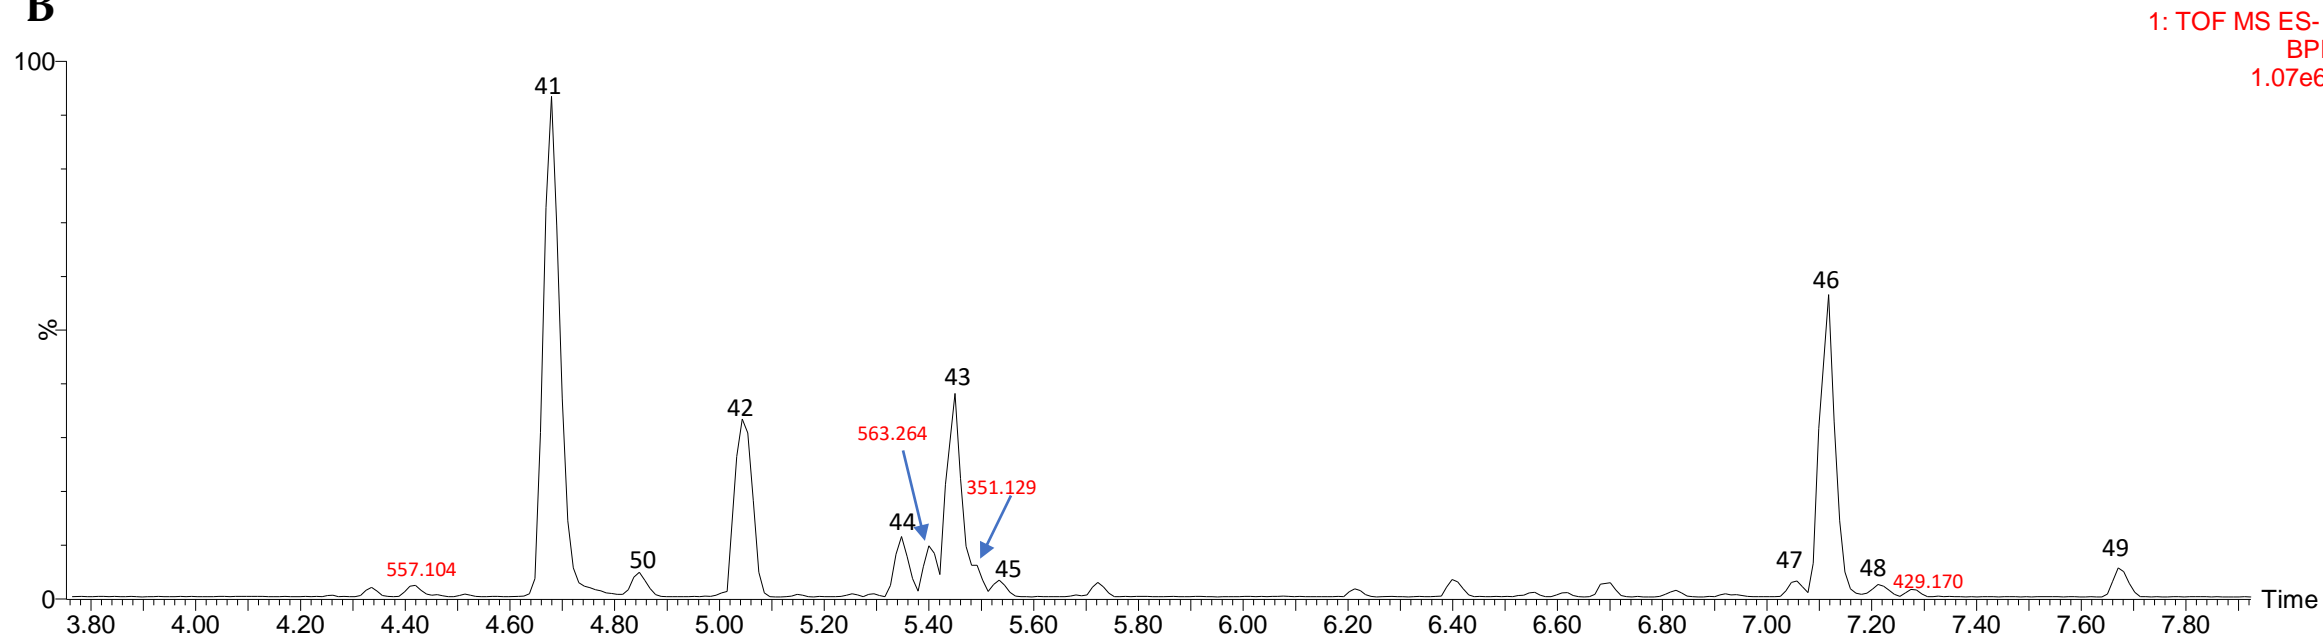

# Pear

**A**

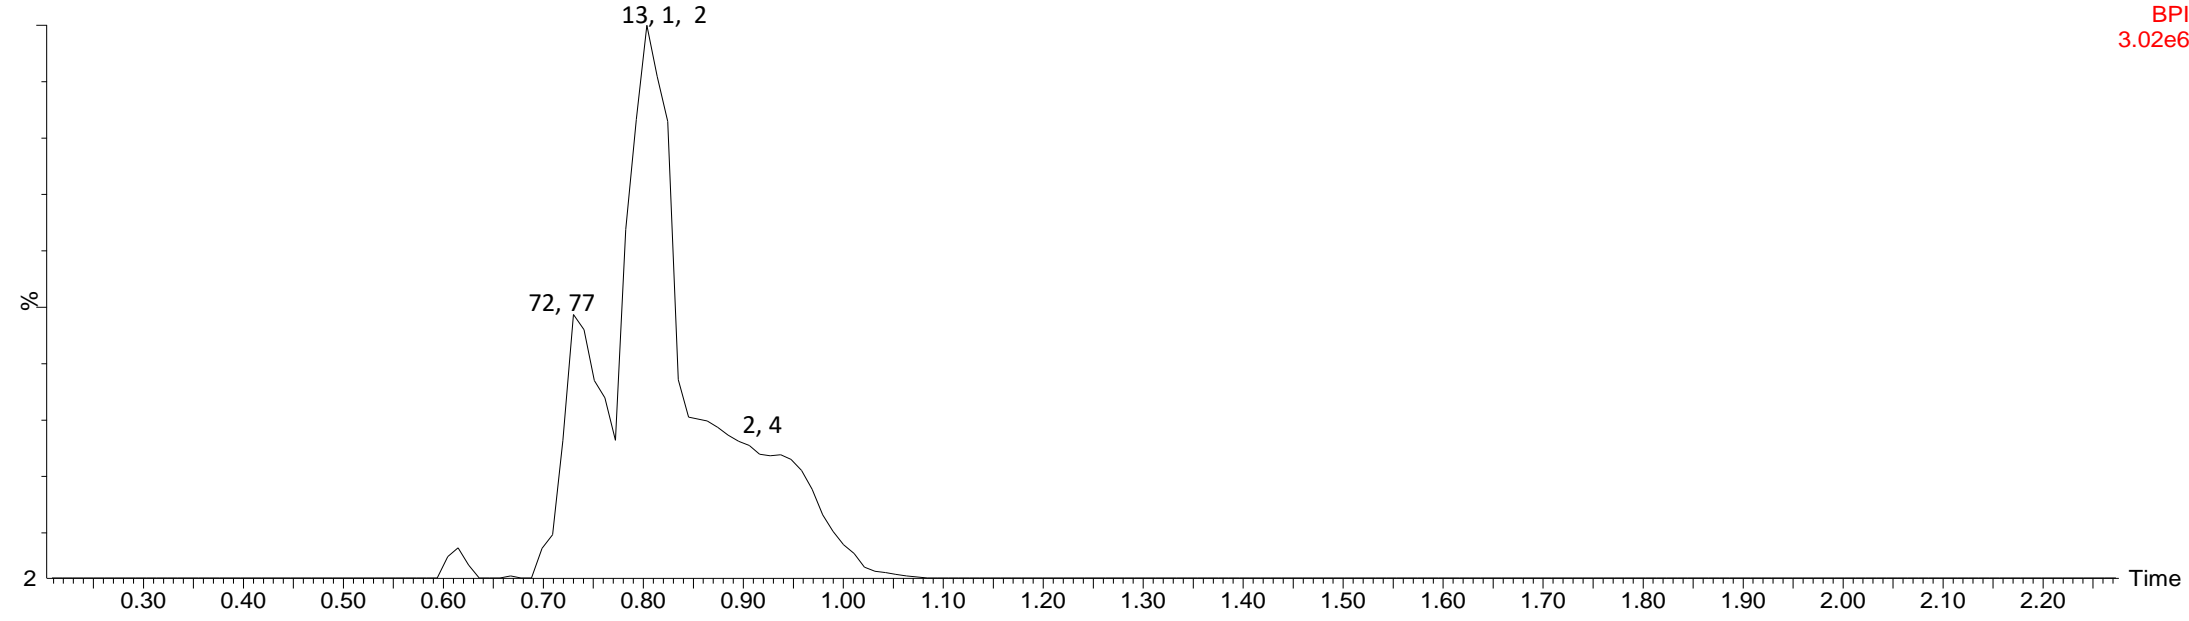

**B**

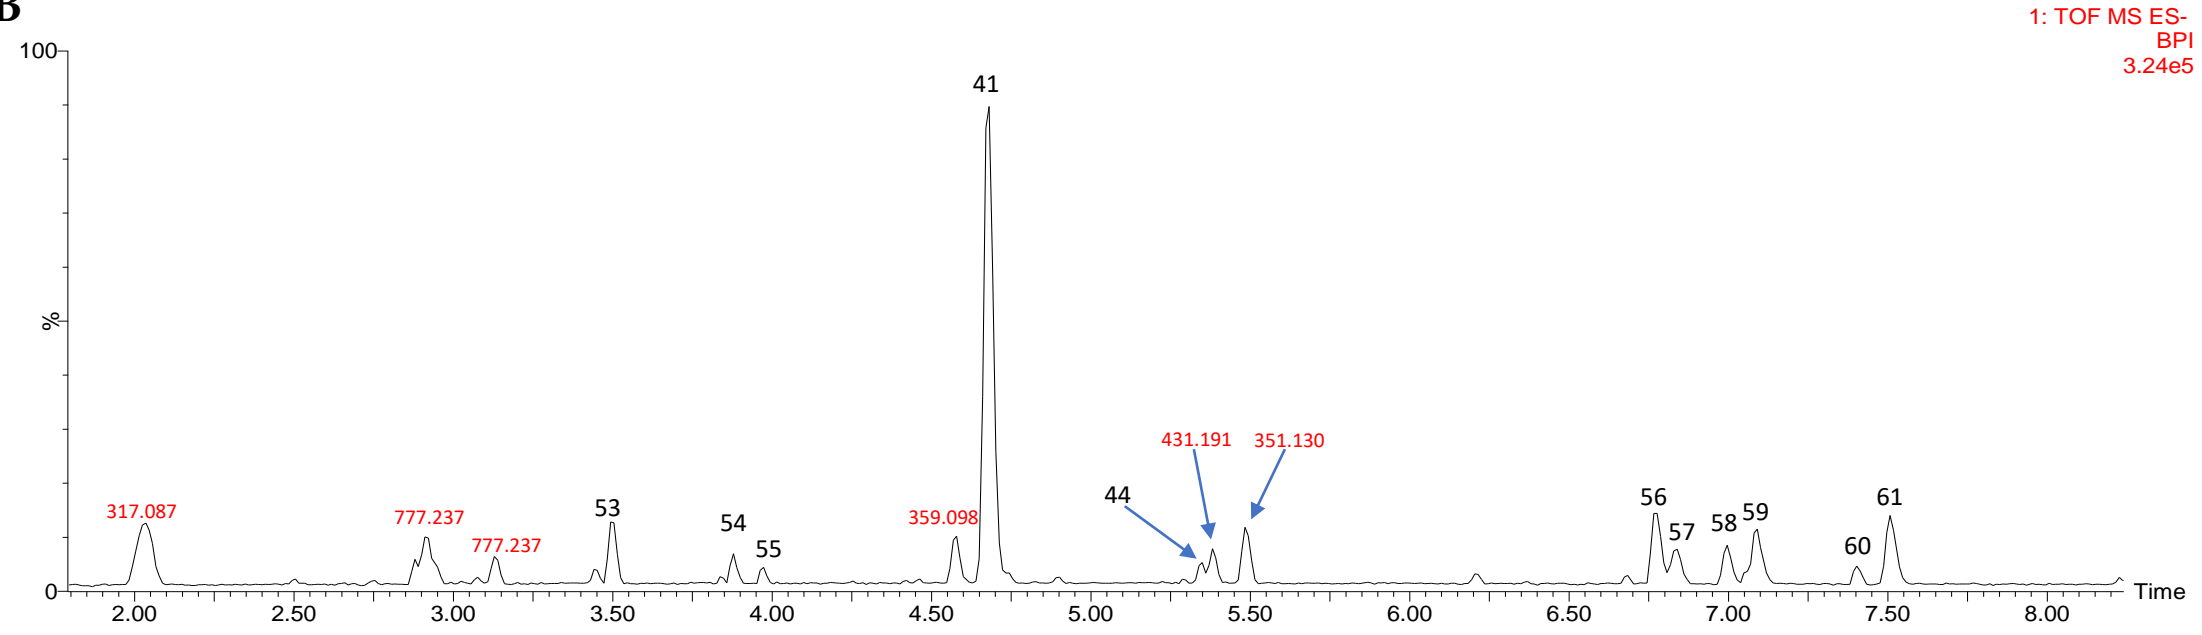

# Nectarine

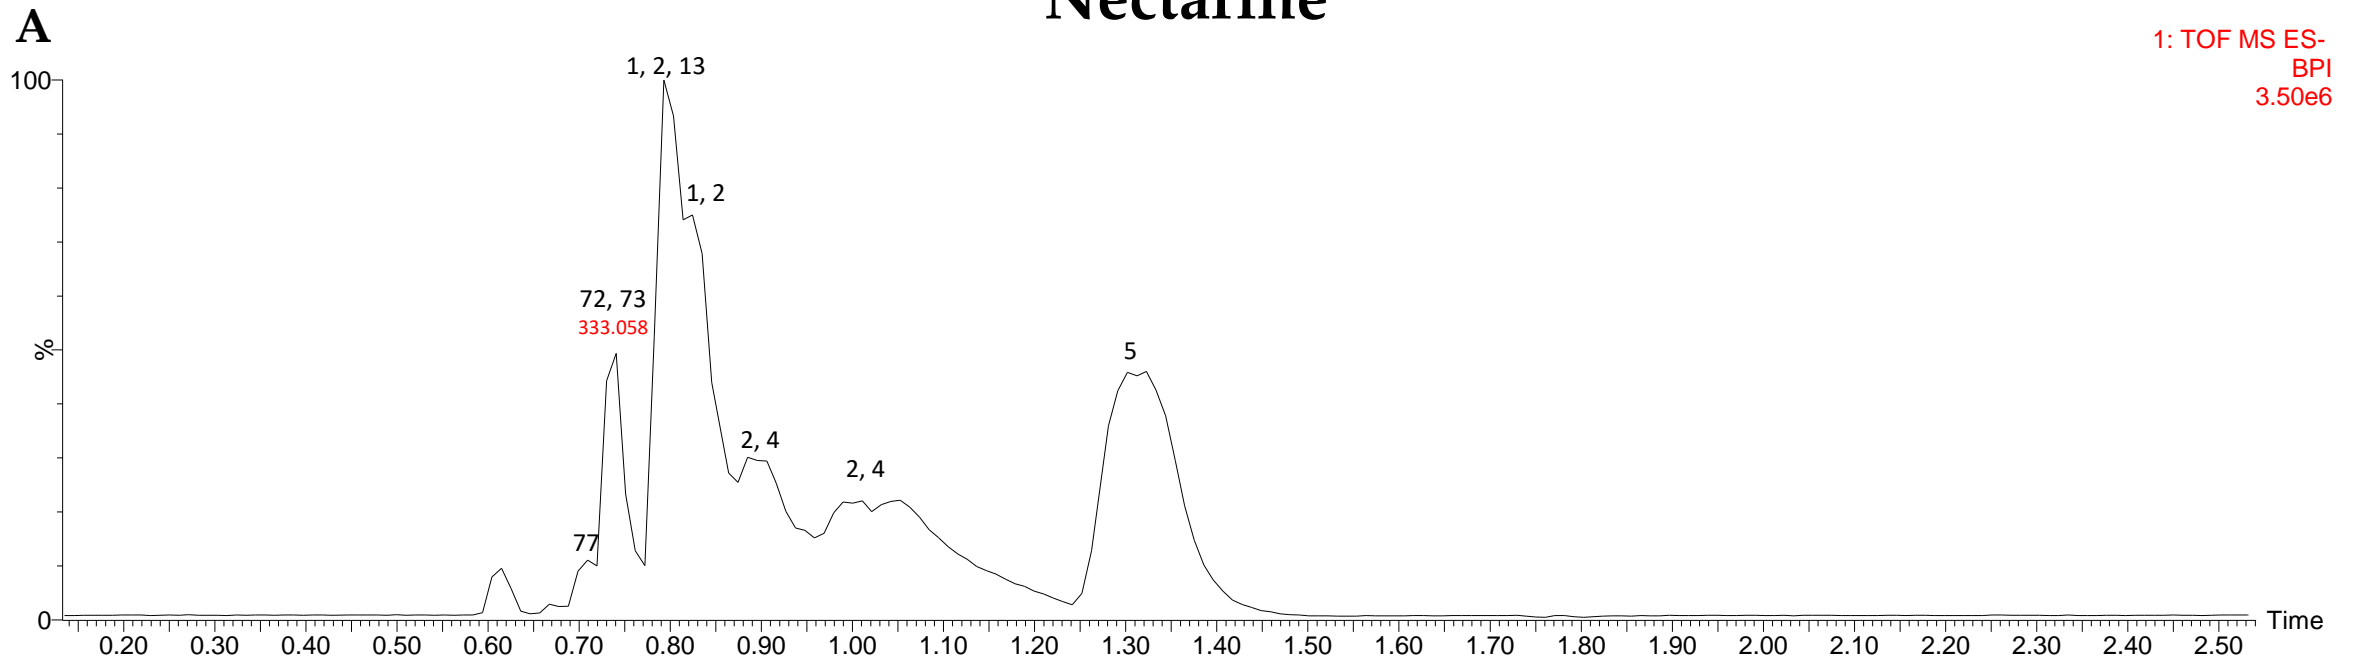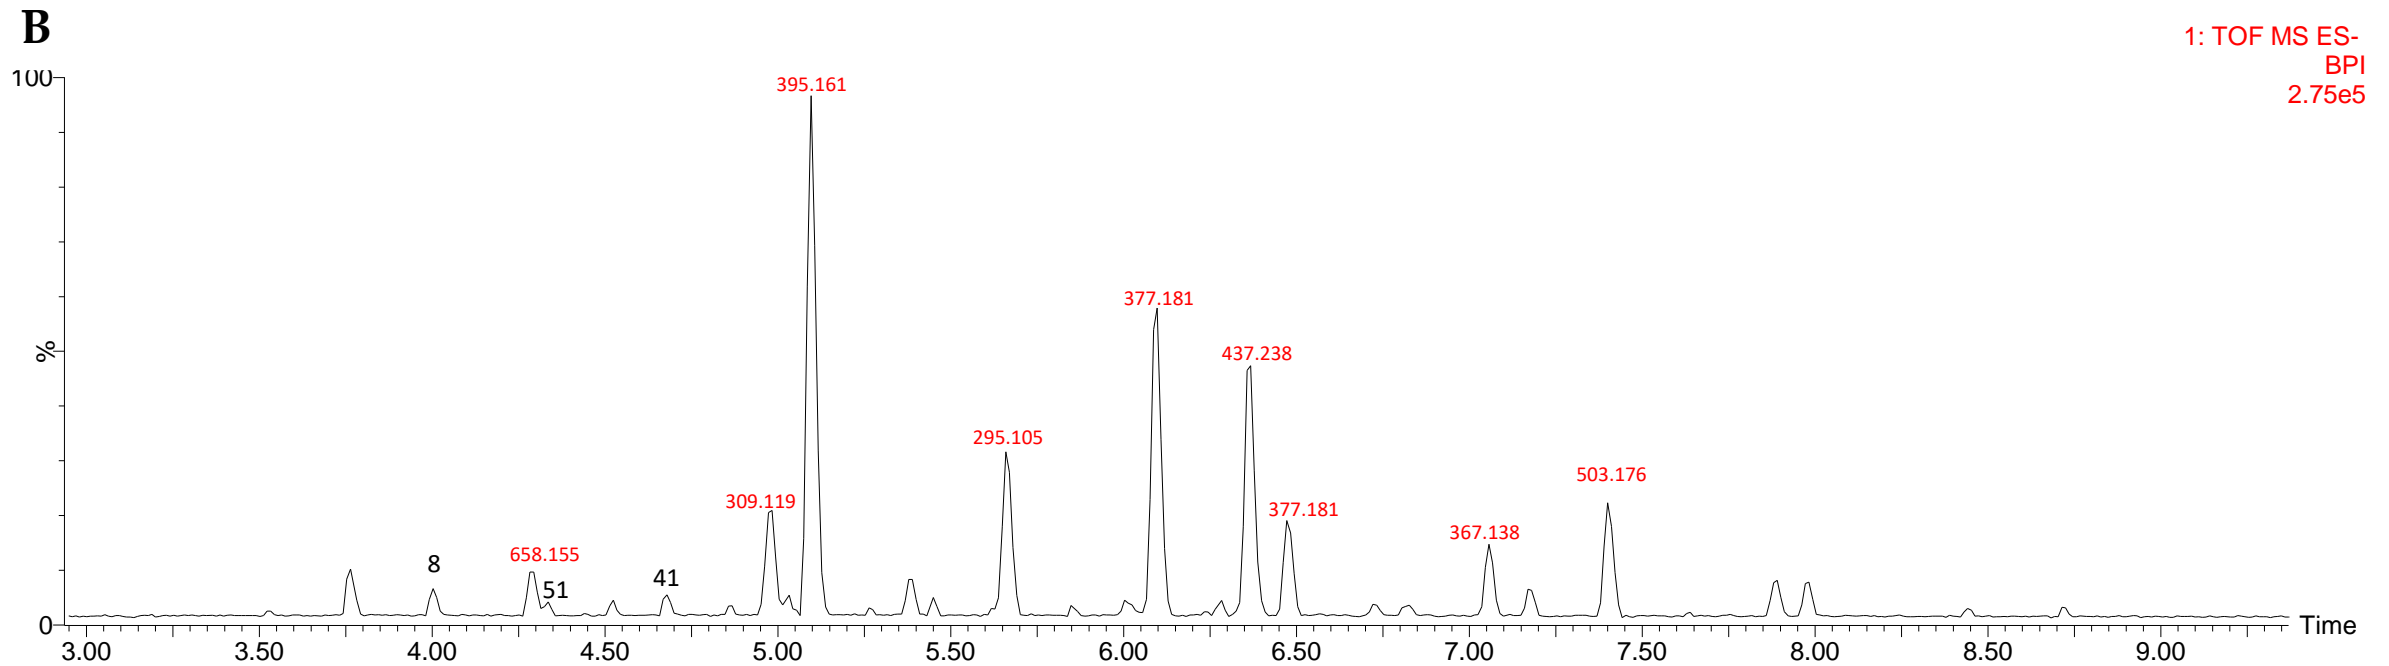



# Peach

**A**

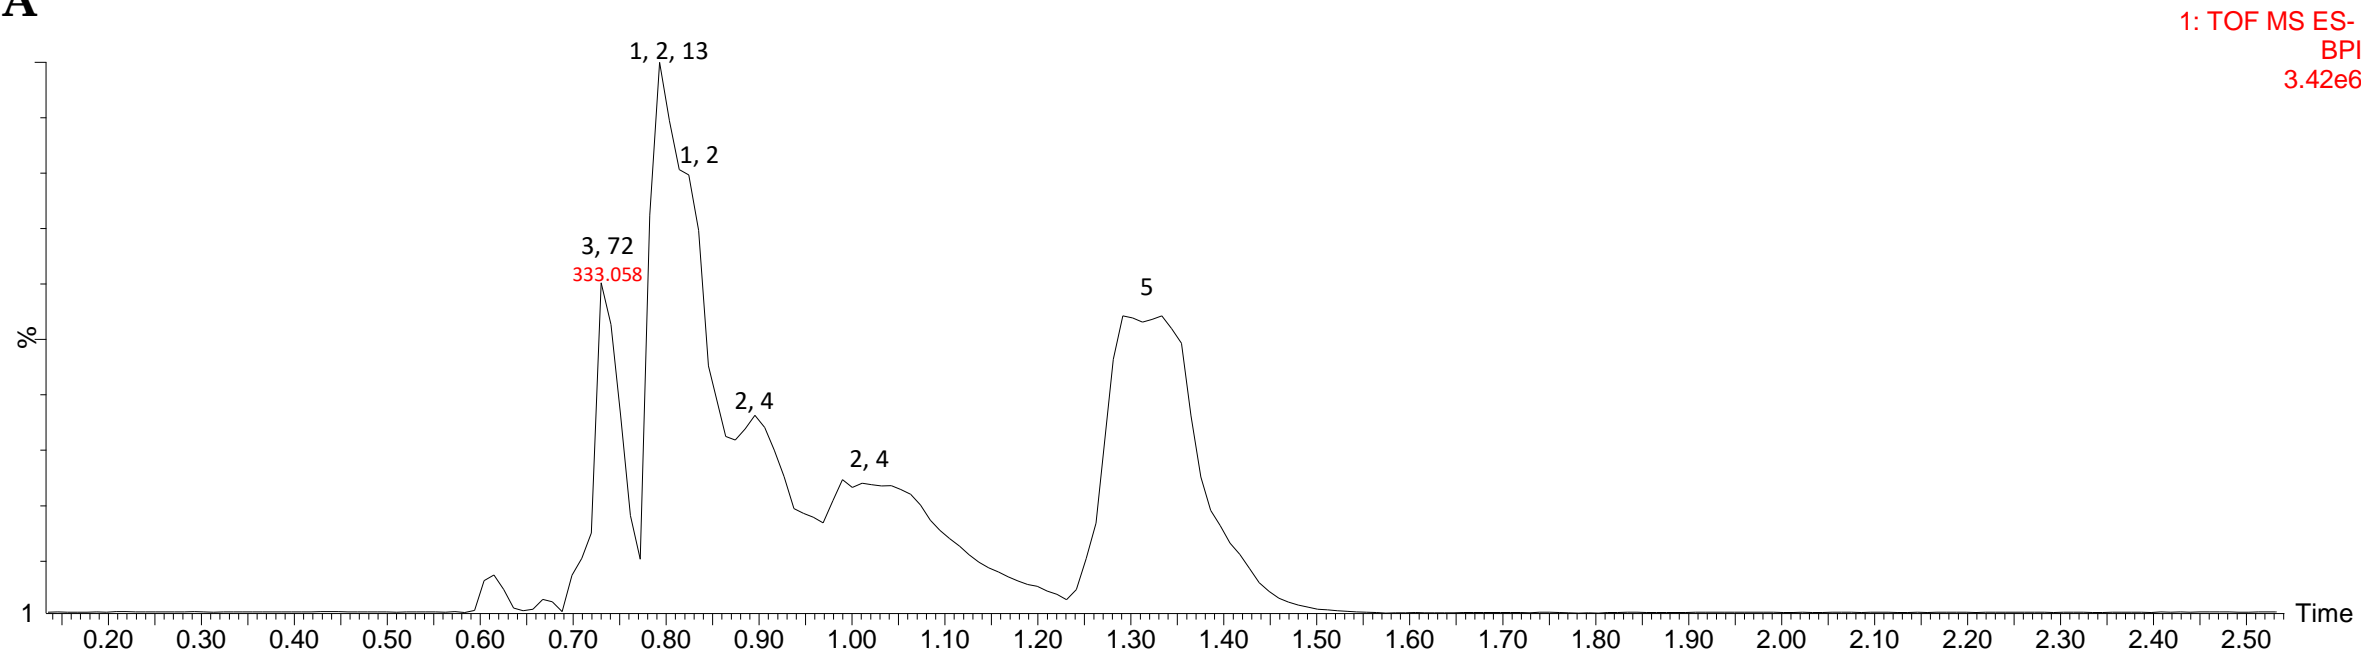

**B**

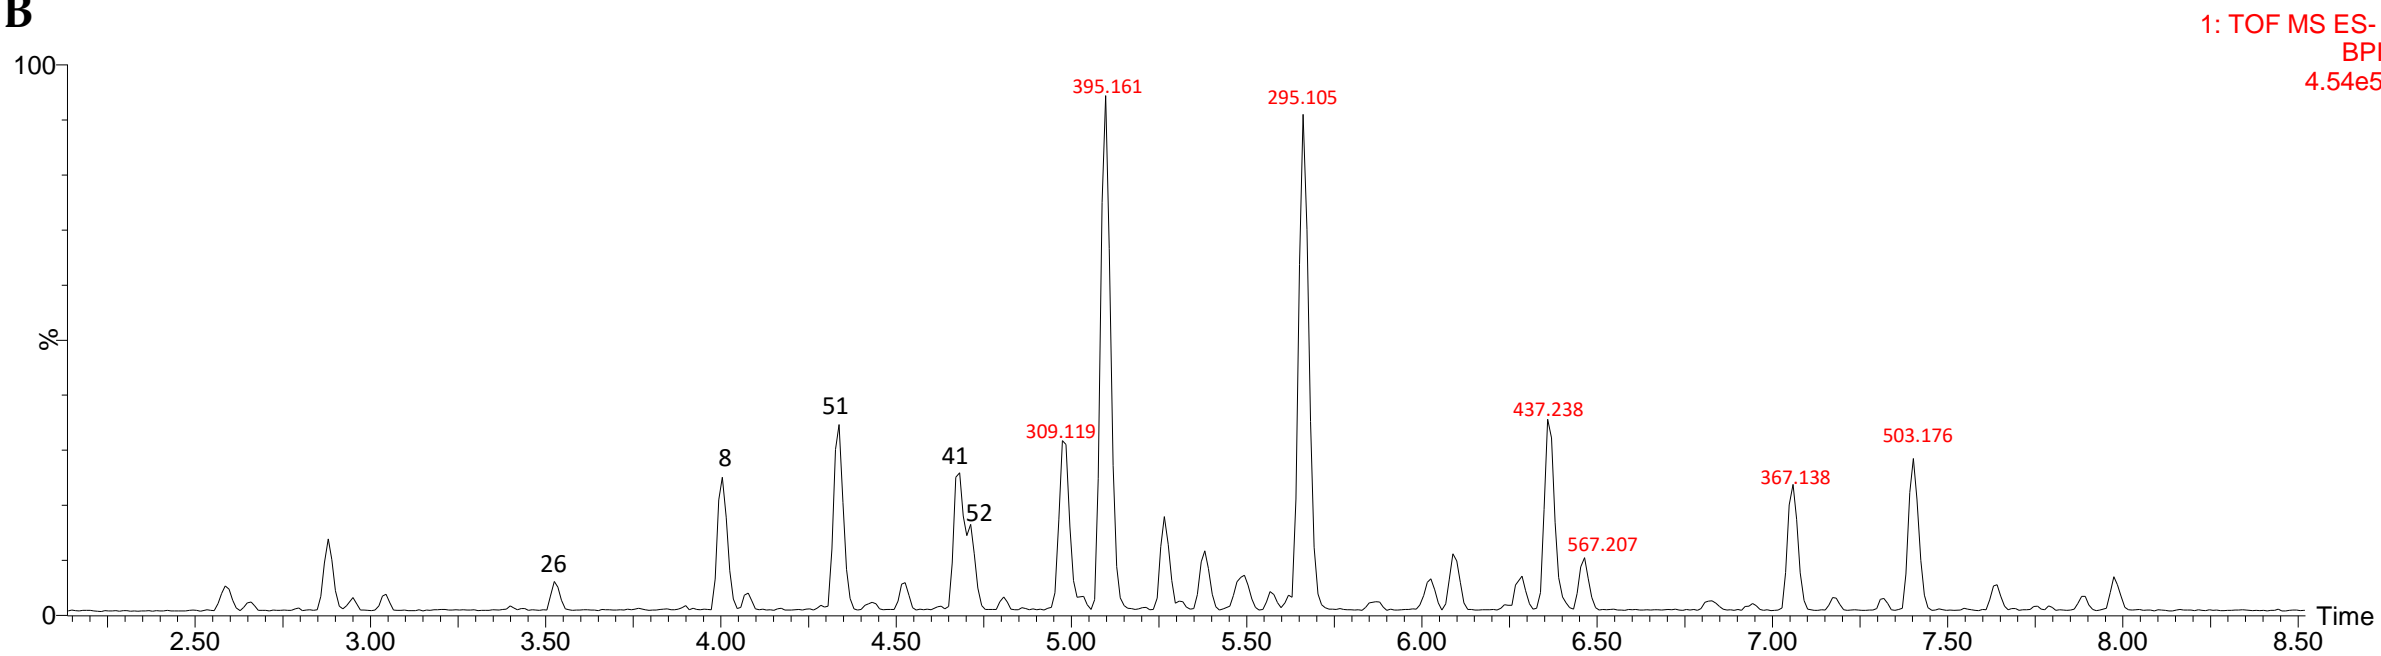

# Ripe Bell Pepper

**A**

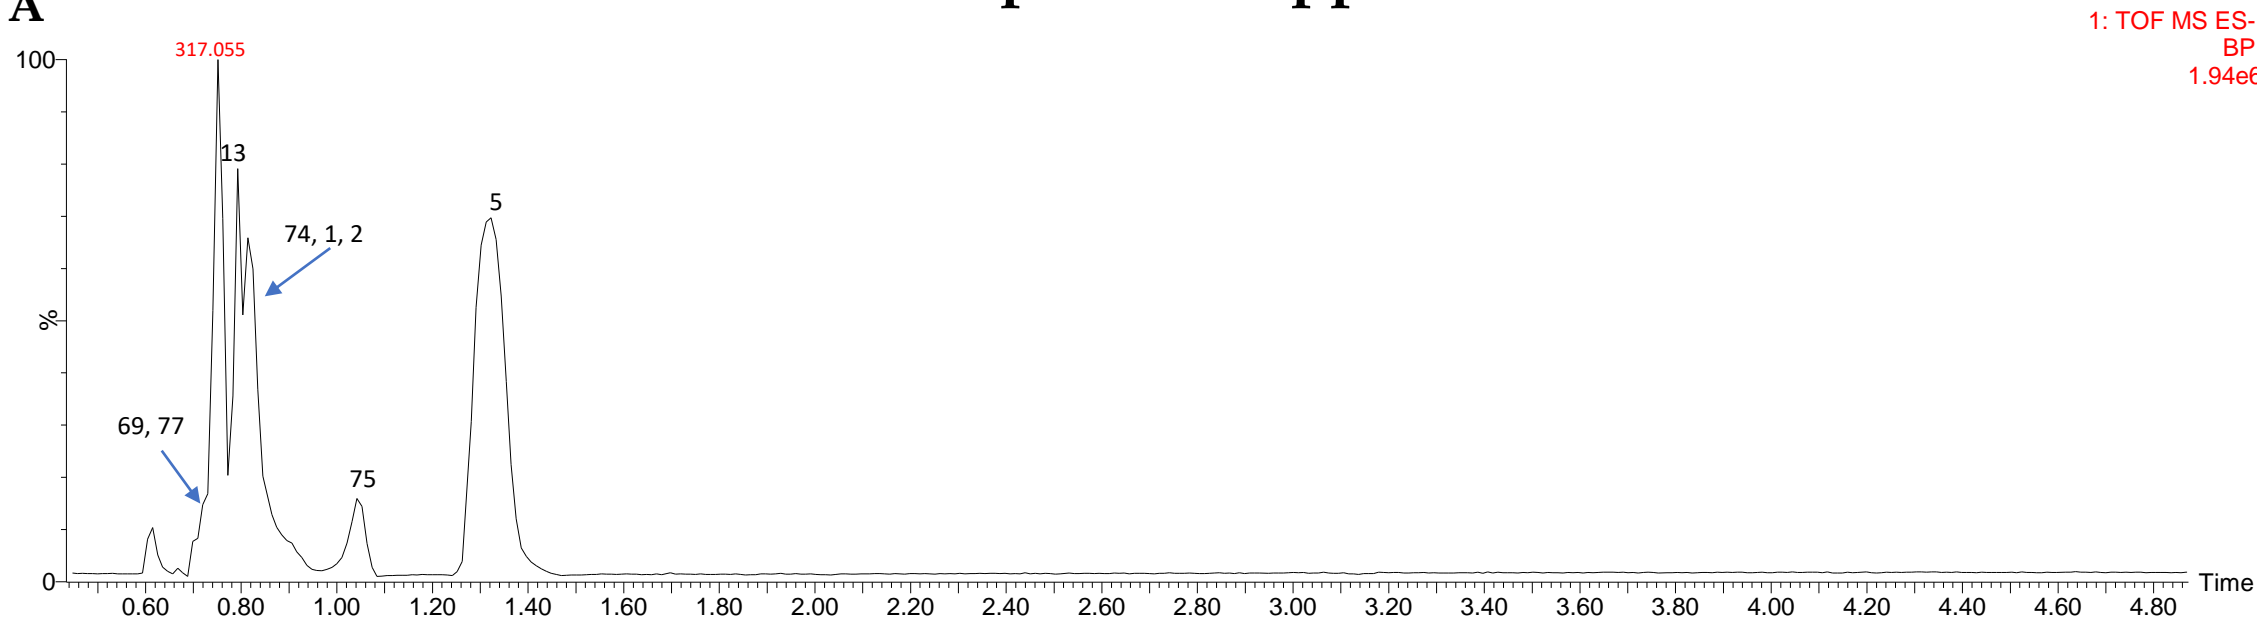

**B**

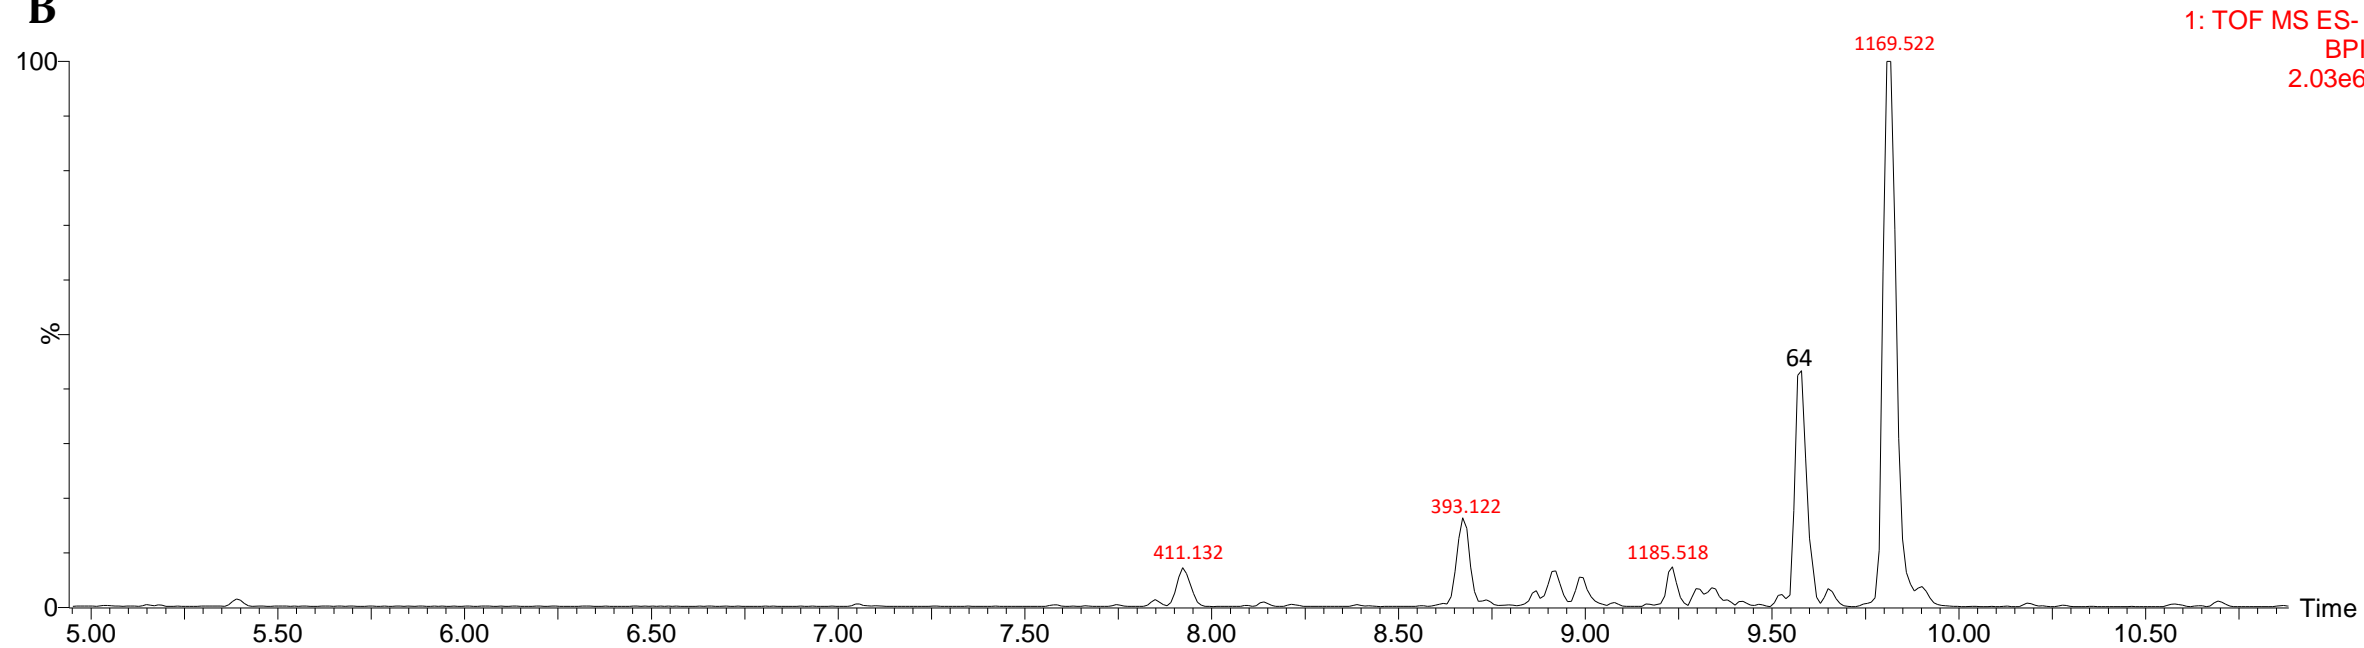

# Unripe Bell Pepper

**A**

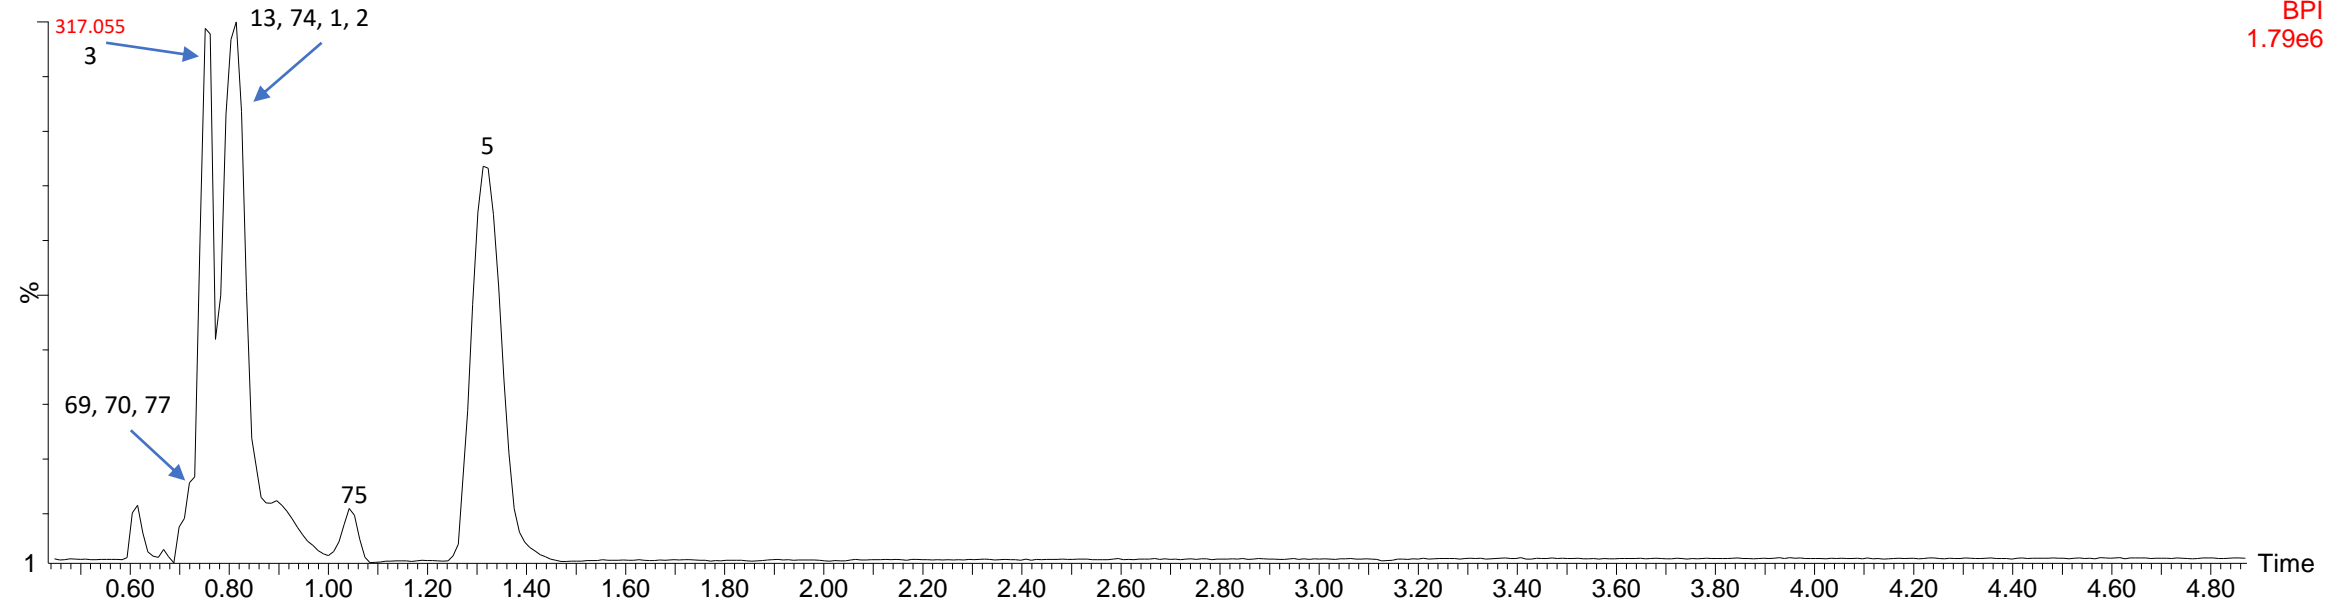

**B**

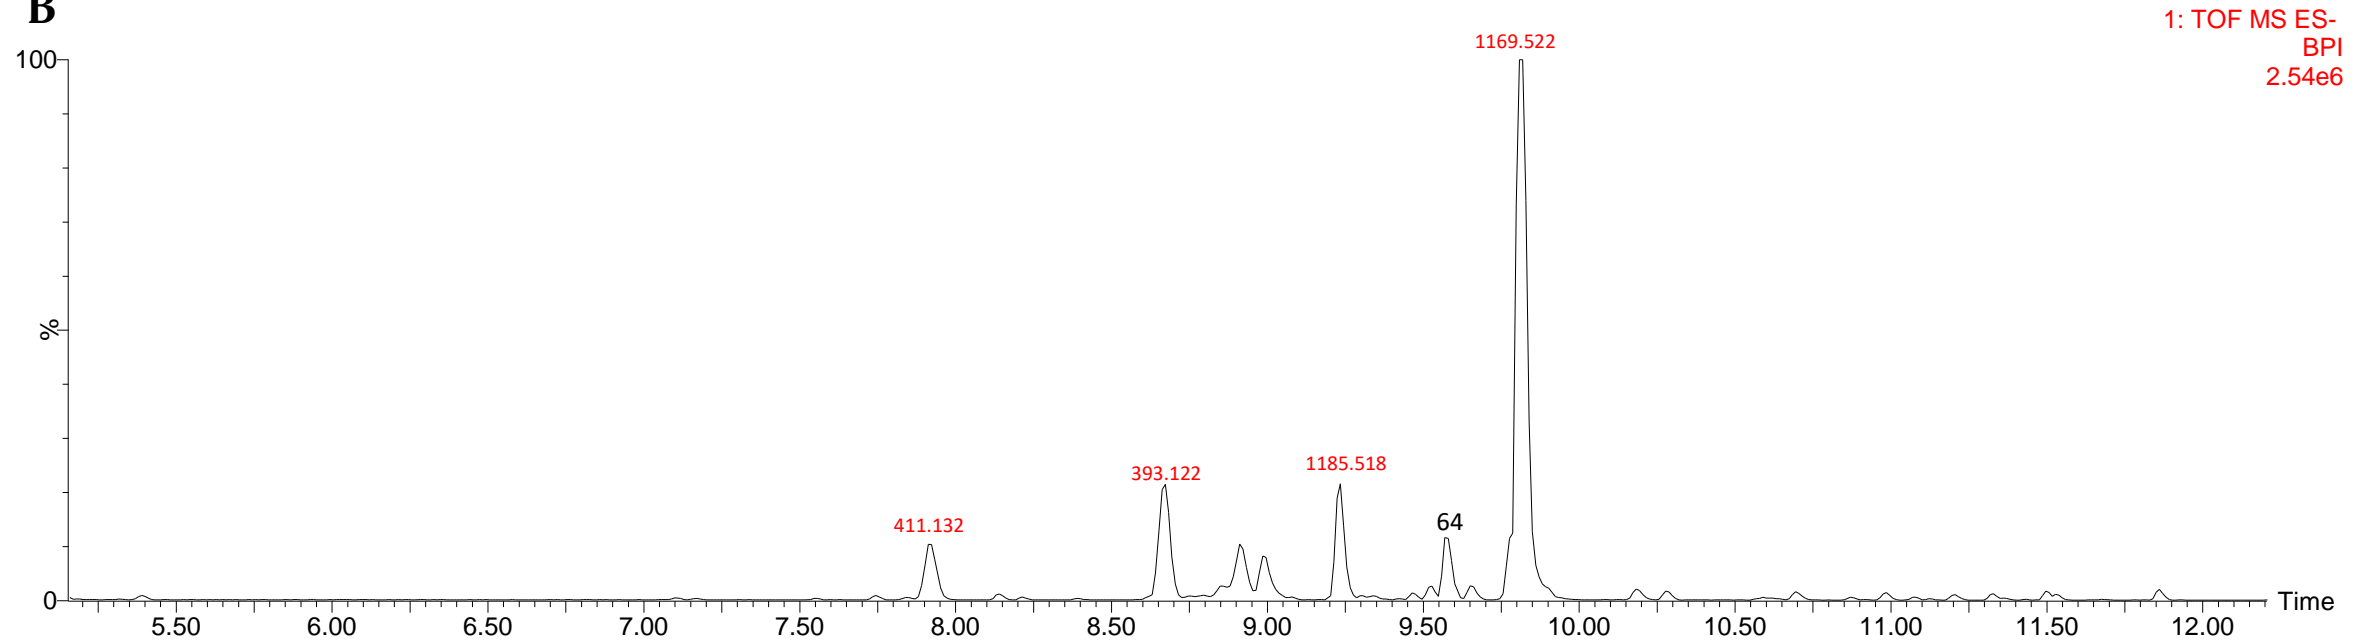

# Tomato

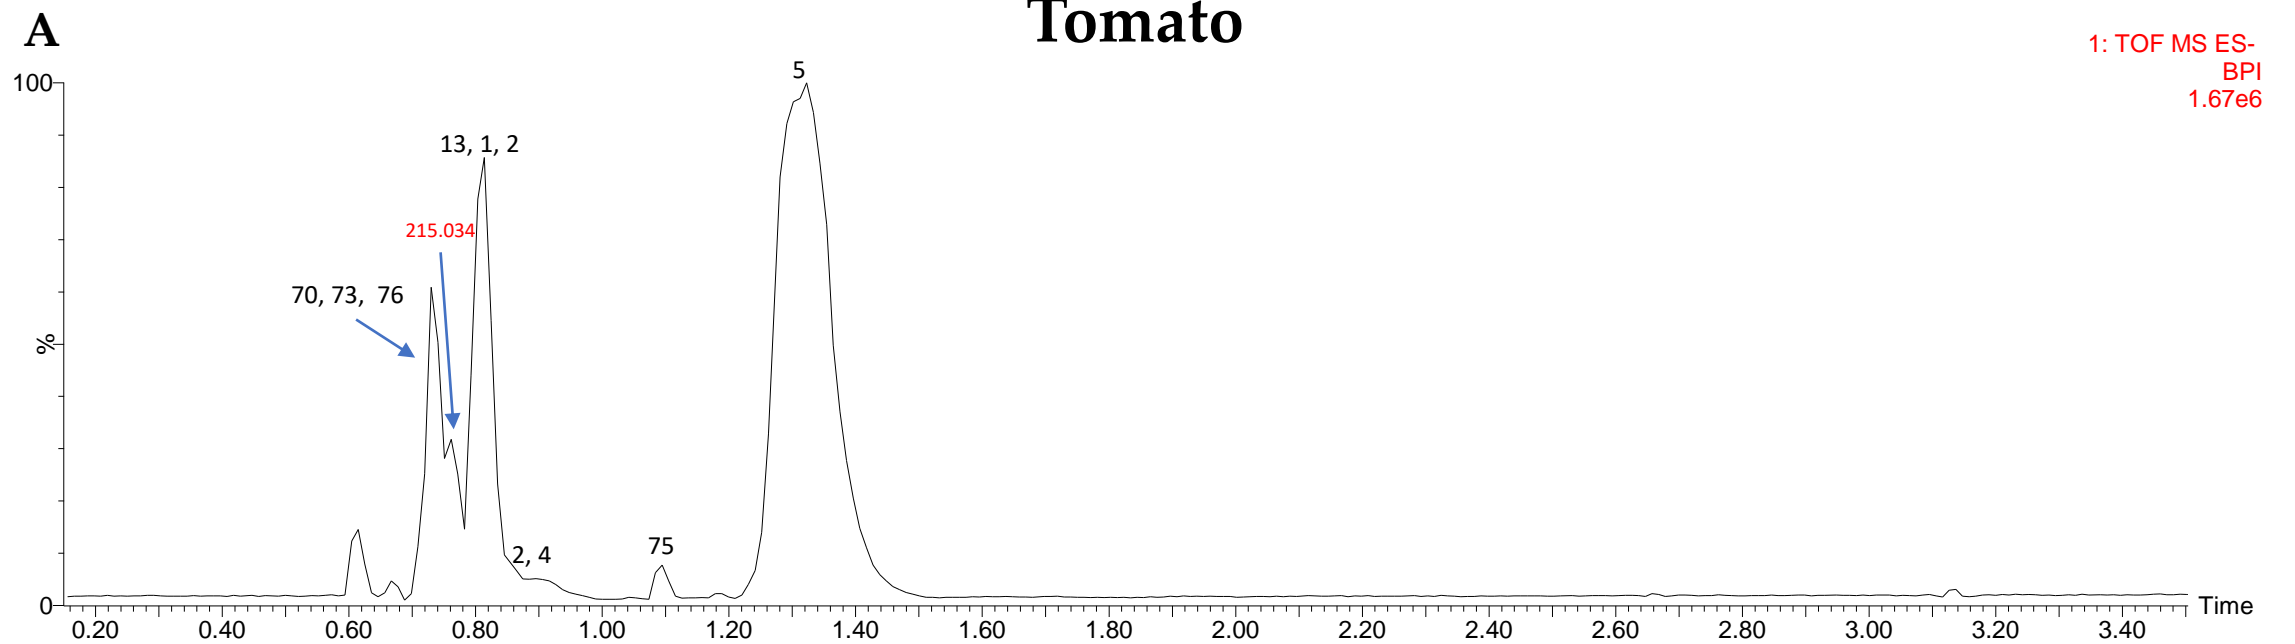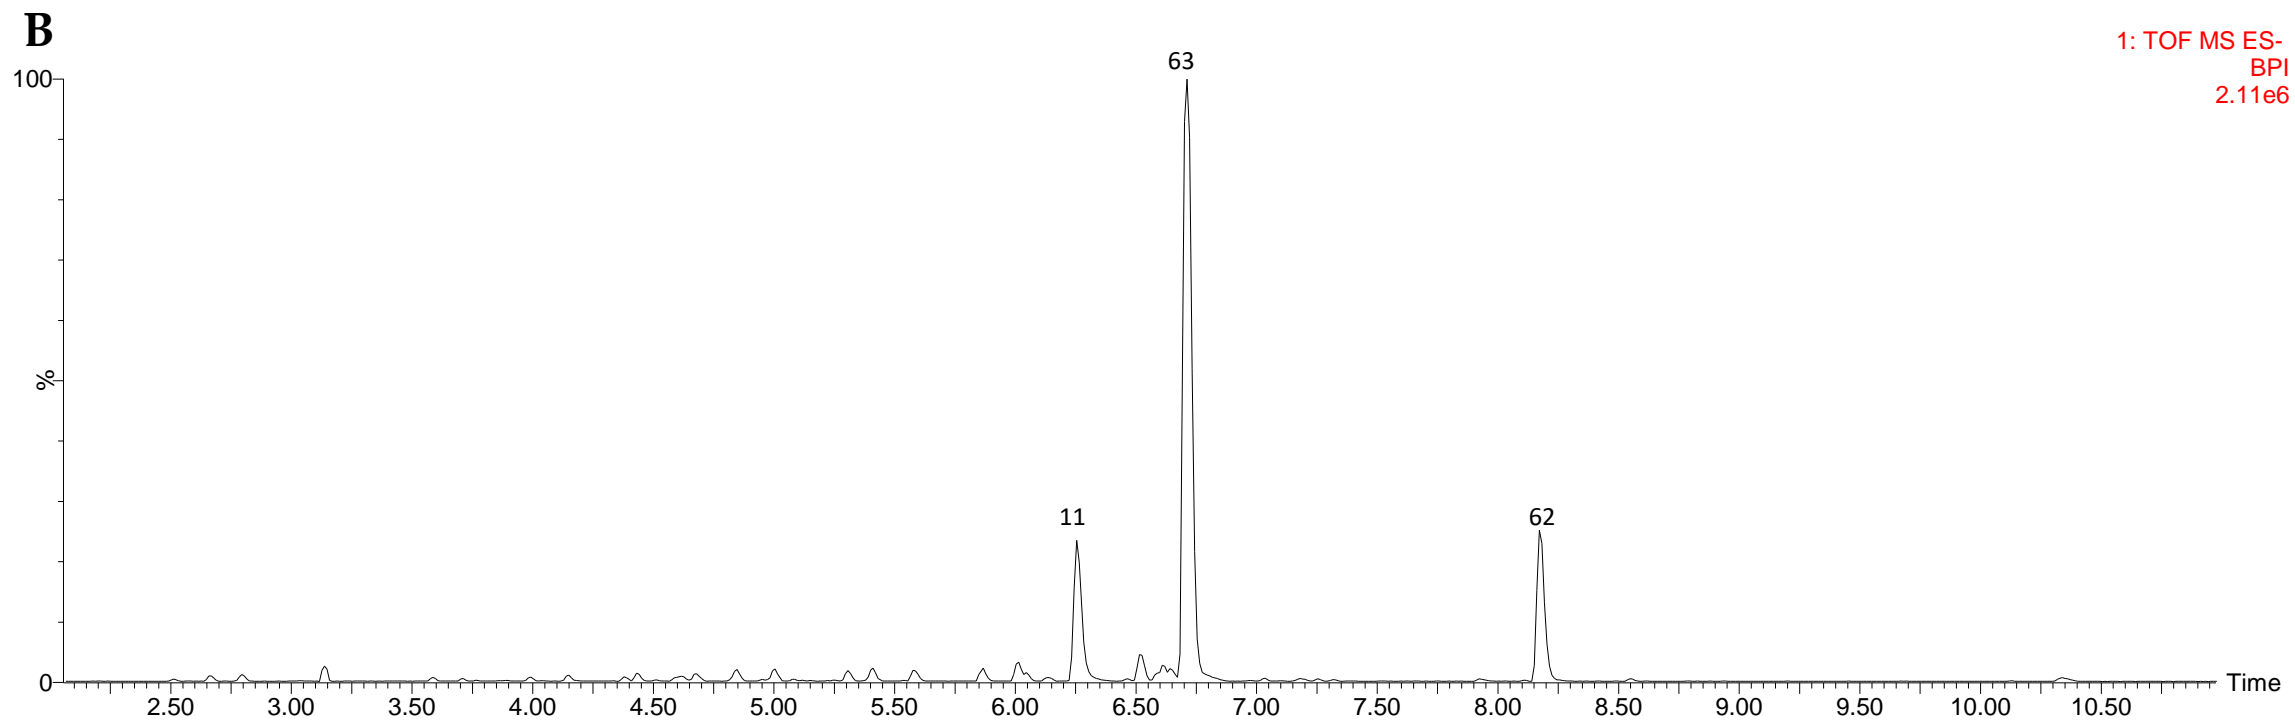

| <b>Organ</b> | <b>Sample</b>              | <b>Relative content of quinic acid<br/>(arbitrary units)</b> | <b>st.dev</b> |
|--------------|----------------------------|--------------------------------------------------------------|---------------|
| Fruit        | Kiwifruit                  | 318.396                                                      | 1.393         |
| Fruit        | Unripe green bell pepper   | 153.364                                                      | 1.182         |
| Fruit        | Fully ripe red bell pepper | 143.982                                                      | 1.785         |
| Fruit        | Pear                       | 114.408                                                      | 1.375         |
| Fruit        | Peach                      | 112.130                                                      | 804           |
| Fruit        | Apple cv. Pom Prussian     | 101.022                                                      | 1.220         |
| Fruit        | Nectarine                  | 98.111                                                       | 1.769         |
| Fruit        | Cherry cv. Black Star      | 69.258                                                       | 436           |
| Fruit        | Cherry cv. Roana           | 61.892                                                       | 787           |
| Fruit        | Tomato                     | 59.250                                                       | 3.765         |
| Fruit        | Apple cv. Golden           | 44.845                                                       | 2.194         |
| Leaves       | Red chicory                | 31.561                                                       | 1.646         |
| Shoot        | Fennel                     | 25.108                                                       | 1.458         |
| Tap root     | Carrot                     | 16.400                                                       | 549           |
| Leaves       | Lettuce                    | 3.099                                                        | 150           |
| Bulb         | Onion                      | 641                                                          | 83            |
| Bulb         | Shallot                    | 610                                                          | 26            |
| Fruit        | Cucumber                   | 196                                                          | 170           |

Comparison of relative content of quinic acid in all the sample, +/- standard deviation. The relative content is extrapolated from UPLC-MS raw data, is expressed in arbitrary units (i.e. area of the extracted peak of quinic acid, referred to the same amount of juice), and is the average of three independent samples. st.dev= standard deviation
